## **Determining *Aspergillus fumigatus* transcription factor expression and function during invasion of the mammalian lung**

Short title: *Aspergillus fumigatus* transcription factor expression and function *in vivo*

Hong Liu,<sup>1</sup> Wenjie Xu,<sup>2†</sup> Vincent M. Bruno,<sup>3</sup> Quynh T. Phan,<sup>1</sup> Norma V. Solis,<sup>1</sup> Carol A. Woolford,<sup>2</sup> Rachel Ehrlich,<sup>2§</sup> Amol C. Shetty,<sup>4</sup> Carie McCracken,<sup>4</sup> Jianfeng Lin,<sup>1</sup> Aaron P. Mitchell,<sup>2,5\*</sup> Scott G. Filler<sup>1,6\*</sup>

<sup>1</sup>Division of Infectious Diseases, Lundquist Institute for Biomedical Innovation at Harbor-UCLA Medical Center, Torrance, CA, United States of America

<sup>2</sup>Department of Biological Sciences, Carnegie Mellon University, Pittsburgh, PA, United States of America

<sup>3</sup>Department of Microbiology and Immunology, University of Maryland, Baltimore, MD, United States of America

<sup>4</sup>Institute for Genome Sciences, University of Maryland, Baltimore, MD, United States of America

<sup>5</sup>Department of Microbiology, University of Georgia, Athens, Georgia, United States of America

<sup>6</sup>David Geffen School of Medicine at UCLA, Los Angeles, CA United States of America

†Current address: Astra Zeneca, Gaithersburg, MD, United States of America

§Current address: Department of Microbiology and Immunology, Drexel University College of Medicine, Philadelphia, PA, United States of America

\*Correspondence: [Aaron.Mitchell@uga.edu](mailto:Aaron.Mitchell@uga.edu); [sfiller@ucla.edu](mailto:sfiller@ucla.edu)

**Funding.** This work was supported by NIH grants R01AI124566 and R01DE026600 to SGF and APM, U19AI110820 to SGF and VMB, and R01AI141360 to VMB. The funders had no role in study design, data collection and analysis, decision to publish, or preparation of the manuscript.

1 **Abstract**

2 To gain a better understanding of the transcriptional response of *Aspergillus fumigatus*  
3 during invasive pulmonary infection, we used a NanoString nCounter to assess the  
4 transcript levels of 467 *A. fumigatus* genes during growth in the lungs of  
5 immunosuppressed mice. These genes included ones known to respond to diverse  
6 environmental conditions and those encoding most transcription factors in the *A.*  
7 *fumigatus* genome. We found that invasive growth *in vivo* induces a unique  
8 transcriptional profile as the organism responds to nutrient limitation and attack by host  
9 phagocytes. This *in vivo* transcriptional response is largely mimicked by *in vitro* growth in  
10 *Aspergillus* minimal medium that is deficient in nitrogen, iron, and/or zinc. From the  
11 transcriptional profiling data, we selected 9 transcription factor genes that were either  
12 highly expressed or strongly up-regulated during *in vivo* growth. Deletion mutants were  
13 constructed for each of these genes and assessed for virulence in mice. Two  
14 transcription factor genes were found to be required for maximal virulence. One was  
15 *rlmA*, which governs the ability of the organism to proliferate in the lung. The other was  
16 *ace1*, which regulates the expression of multiple secondary metabolite gene clusters  
17 and mycotoxin genes independently of *laeA*. Using deletion and overexpression  
18 mutants, we determined that the attenuated virulence of the  $\Delta ace1$  mutant is due to  
19 decreased expression *aspf1*, which specifies a ribotoxin, but is not mediated by reduced  
20 expression of the fumigaclavine gene cluster or the fumagillin-pseruotin supercluster.  
21 Thus, *in vivo* transcriptional profiling focused on transcription factors genes provides a  
22 facile approach to identifying novel virulence regulators.

23

24

## 25 **Author summary**

26 Although *A. fumigatus* causes the majority of cases of invasive aspergillosis, the function  
27 of most of the genes in its genome remains unknown. To identify genes encoding  
28 transcription factors that may be important for virulence, we used a NanoString nCounter  
29 to measure the mRNA levels of *A. fumigatus* transcription factor genes in the lungs of  
30 mice with invasive aspergillosis. The transcriptional profiling data indicate that the  
31 organism is exposed to nutrient limitation and stress during growth in the lungs, and that  
32 it responds by up-regulating genes that encode mycotoxins and secondary metabolites.  
33 *In vitro*, this response was most closely mimicked by growth in medium that was  
34 deficient in nitrogen, iron and/or zinc. Using the transcriptional profiling data, we  
35 identified two transcription factors that govern *A. fumigatus* virulence. These were RlmA,  
36 which is governs proliferation in the lung and Ace1, which controls the production of  
37 mycotoxins and secondary metabolites.

38

## 39 **Introduction**

40 The fungus *Aspergillus fumigatus* is the major cause of invasive aspergillosis, a  
41 progressive pulmonary infection that may disseminate [1-3]. Risk factors for invasive  
42 aspergillosis include chemotherapy, corticosteroids, HIV infection, anti-TNF therapy, and  
43 solid organ or stem cell transplantation. Because of the growing population of patients  
44 at risk of invasive aspergillosis, the annual incidence of this infection has more than  
45 tripled since 1990 [2, 4]. Moreover, resistance has emerged to azoles, the front-line  
46 therapy for invasive aspergillosis [5, 6]. Therefore, there is an urgent need to understand  
47 *A. fumigatus* pathogenicity mechanisms to develop new therapeutic and diagnostic  
48 approaches.

49 Gene expression during infection can provide deep insight into virulence  
50 determinants. However, among 10,180 predicted genes in the *A. fumigatus* genome,

51 over 95% are uncharacterized, and fewer than 100 genes have demonstrated roles in  
52 virulence. There have been three genome-wide studies of *A. fumigatus* gene expression  
53 during *in vivo* infection in the mouse model of pulmonary infection [7-9]. These studies  
54 revealed that in early germlings there is up-regulation of respiration, central metabolism,  
55 and amino acid biosynthesis genes. At later times, as tissue invasion is initiated, there is  
56 up-regulation of cation transport, secondary metabolism, and iron metabolism genes.  
57 The authors noted consistent up-regulation of secreted protein genes throughout the  
58 infection time-course. These gene expression results are mirrored by functional analysis  
59 indicating that defects in iron acquisition, amino acid biosynthesis regulation, and  
60 secondary metabolite synthesis all lead to reduced virulence in mouse infection models  
61 [1, 10].

62         These foundational studies investigated gene expression in *A. fumigatus* cells  
63 recovered by bronchoalveolar lavage. However, it was not possible to investigate gene  
64 expression more than 16 h post-infection because the fungal cells had invaded the lung  
65 tissue. To investigate *A. fumigatus* gene expression during tissue invasion, we have  
66 taken a different approach, using NanoString technology to assay fungal gene  
67 expression in whole lung homogenates. The NanoString nCounter measures RNA  
68 levels through probe-based technology and is generally more practical for focused gene  
69 set assays than for genome-wide analysis. Here, we used this approach to assay  
70 expression of predicted transcription factor genes during invasive growth in the lungs of  
71 immunosuppressed mice. Using these data, we selected a panel of transcription factor  
72 genes for functional analysis. We found two transcription factor genes, *RlmA* and *Ace1*,  
73 with distinct roles in pathogenicity. *RlmA* is required for proliferation in the lung, whereas  
74 *Ace1* is required for production of secondary metabolites, especially Asp f1, that mediate  
75 pathogenicity. Furthermore, we determined that *in vitro* growth of *A. fumigatus* in  
76 *Aspergillus* minimal medium with low zinc and low nitrogen induced a transcriptional

77 response that was similar to response induced during invasive growth in the lung of  
78 immunosuppressed mice.

79

## 80 **Results and Discussion**

### 81 **Invasive infection induces expression of genes involved in nutrient acquisition,** 82 **stress response, and secondary metabolite biosynthesis**

83 To determine the transcriptional response of *A. fumigatus* during invasive infection, we  
84 developed two NanoString probesets. The first was a pilot set that contained probes for  
85 97 genes with functional annotations that included metabolism, iron acquisition, hypoxia,  
86 cell wall, and stress response, as described previously [11, 12]. The second contained  
87 probes for 400 genes that specify virtually all predicted transcription factors in the *A.*  
88 *fumigatus* genome. We focused on transcription factor genes (TF genes) for three  
89 reasons. First, a single transcription factor often controls many functionally related  
90 genes, so transcription factor mutants frequently have more prominent phenotypes than  
91 mutations in individual target genes [13-17]. Thus, our dataset might be useful for  
92 selection of TF genes for functional analysis. Second, there are many methods to  
93 identify the indirect or direct targets of a transcription factor, including expression  
94 profiling and chromatin immunoprecipitation. Thus, a transcription factor defect can be  
95 linked to its target genes to provide physiological and mechanistic insight. Third,  
96 transcription factors are prospective drug targets [18], so their analysis can lead to  
97 therapeutic benefit.

98         The transcriptional profiling was performed on RNA isolated from the lungs of  
99 mice with invasive aspergillosis, a model that mimics many aspects of human disease  
100 [19, 20]. In this model, the mice were immunosuppressed with cortisone acetate and  
101 then infected with *A. fumigatus* Af293 via an aerosol chamber, which delivered  
102 approximately  $5 \times 10^3$  conidia to the lungs of each mouse. RNA was prepared from

103 whole lung samples at 2, 4 and 5 days post-infection. In this infection model, mortality  
104 begins by day 6 post-infection. There was some overlap between the two sets of probes  
105 so the final dataset contained expression data for 467 genes. Data quality was excellent  
106 at days 4 and 5 post-infection (S1 Fig); the majority of probes gave detectable signals,  
107 and  $R^2$  values for independent determinations were all  $>0.95$ . Data quality was weaker  
108 at day 2 post-infection, a reflection of the low *A. fumigatus* titer at that time.

109 We expected that once *A. fumigatus* achieved steady-state invasive growth, its  
110 gene expression profile would be similar in successive time points. Our data support  
111 this hypothesis, indicating that there are similar gene expression states at days 4 and 5  
112 post-infection (S1 Table). The mean normalized probe counts for all genes assayed at  
113 days 4 and 5 were very similar, with an  $R^2$  value of 0.96, and no statistical support for  
114 differential expression of 88% of genes. The genes that showed most extreme variation  
115 between samples were close to the lower detection limits on both days 4 and 5, and thus  
116 small changes in the numbers of probe counts lead to large differences in calculated  
117 expression ratios. Therefore, our data indicate that gene expression states are very  
118 similar on days 4 and 5, shortly before mortality begins.

119 Growth in the mouse lung resulted in an extensive change in the *A. fumigatus*  
120 transcriptional profile compared to growth in *Aspergillus* minimal medium (AMM). Of the  
121 467 genes analyzed, 125 (27%) were up-regulated by at least 2-fold and 85 (18%) were  
122 down-regulated by at least 2-fold at 5 days post-infection (S1 Table). There was  
123 significant up-regulation of genes involved in iron acquisition, including *fre2*, *hapX*, *sidA*,  
124 *sidD*, *mirB*, and *sit1* (Table 1). Concomitantly, there was down-regulation of *sreA*,  
125 whose product represses iron uptake and siderophore synthesis [21]. Other up-regulated  
126 genes include *zrfC*, *zrfA*, *aspf2*, and *zafA*, which govern zinc uptake, *nrtB* and *areA*,  
127 which control nitrogen uptake, and Afu5g00710, which specifies a GABA permease  
128 (Table 1). We infer that growth in the lung imposes limitation for key nutrients, including

129 iron, zinc, and nitrogen, on *A. fumigatus*. Our results are consistent with prior studies of  
130 *A. fumigatus* mutants with defects in iron acquisition ( $\Delta hapX$ ,  $\Delta sidA$ ), zinc homeostasis  
131 ( $\Delta zafA$ ), and nitrogen uptake ( $\Delta areA$ ), all of which have attenuated virulence in mice [22-  
132 25].

133 Some TF genes that are known to govern virulence were not strongly up-  
134 regulated by invasive growth in the lung. These include *srbA*, which is required for  
135 growth under hypoxia [26], *hacA* which governs the unfolded protein response [27], and  
136 *pacC*, which is required for growth under alkaline pH [7]. The expression of these TF  
137 genes was increased by less than 2-fold *in vivo* (*srbA* and *pacC*) or even reduced (*hacA*)  
138 (Table 1). However, the NanoString counts indicated that all three genes were among  
139 the 30 most highly expressed genes *in vivo*. This result suggests that in *A. fumigatus*, TF  
140 genes that are highly expressed *in vivo* are likely to govern virulence, even if their  
141 expression *in vivo* does not increase relative to growth *in vitro*. We have observed a  
142 similar relationship between *in vivo* gene expression levels and virulence regulation in *C.*  
143 *albicans* [13].

144 In corticosteroid-treated mice with invasive aspergillosis, the invading hyphae  
145 stimulate an influx of neutrophils into the lung that accumulate around the organisms [19,  
146 20]. These neutrophils are almost certainly responsible for the up-regulation of genes  
147 that are required for normal stress response and virulence in *A. fumigatus*, such as  
148 *sebA*, *mkk2*, and *sho1* [28-30] (Table 1). Surprisingly, some genes involved in stress  
149 response were actually down-regulated during *in vivo* growth. These genes included  
150 *hsp90*, *cat2*, *sod2*, and *dprA* (Table 1). Collectively, these results indicate that *in vivo*  
151 growth induces expression of only a subset of stress response genes.

152 Growth in the lung also altered the expression of genes involved in the  
153 production of specific secondary metabolites. As compared to organisms grown in  
154 AMM, organisms in the mouse lung had a 700-10,000-fold increase in expression of *gliG*



155 and *gliP*, which specify enzymes in the gliotoxin biosynthesis pathway [31-33] (Table 1).  
156 Furthermore, there was 40-fold up-regulation of *gliZ*, which encodes the transcription  
157 factor that governs gliotoxin synthesis [34], and 9-fold up-regulation of *mtfA*, which  
158 induces synthesis of both gliotoxin and extracellular proteases [35] (Table 1). *In vivo*  
159 growth also up-regulated expression of *nscR* whose product governs synthesis of  
160 neosartoricin [36] and of *aspHS*, which specifies a hemolysin (Table 1). However, *in*  
161 *vivo* growth repressed the expression of *aspf1* which encodes a ribotoxin [12, 37], *fumR*,  
162 which governs production of fumagillin and pseurotin [38, 39], *hasA*, which controls  
163 production of hexadecahydroastechrome [40], and *tpcE*, which regulates production of  
164 trypacidin and questin [41] (Table 1). Thus, growth in the mouse lung induces  
165 production of a distinct subset of mycotoxins. We speculate that the mycotoxin genes  
166 whose expression was down-regulated in the lung must be expressed in other  
167 environmental niches, possibly including other anatomic sites within the host.

168

169 **Comparisons among gene expression profiles to identify *in vitro* conditions that**  
170 **mimic *in vivo* growth**

171 Similarities among gene expression profiles can reveal parallels among diverse genetic  
172 or environmental regulatory inputs. To assess similarity, we adapted our Fisher's Exact  
173 Test (FET) comparison tool for use with *A. fumigatus* gene expression data. We created  
174 a database from 129 published microarray or RNA-seq datasets and generated  
175 NanoString profiles of *A. fumigatus* during growth in standard AMM and in AMM  
176 modified to mimic aspects of *in vivo* growth: limitation for nitrogen, iron, zinc, or oxygen;  
177 presence of serum; limitation for combinations of nitrogen, iron, and zinc. Datasets with  
178 significant similarity among genes up-regulated on day 5 postinfection (compared to  
179 growth in AMM) are listed in Table 2. A heat map clustering of some of these datasets is  
180 shown in Figure 1.

181           These comparisons indicated that our transcriptional profiles of invasive *A.*  
182 *fumigatus* were significantly similar to the published profiles of germlings isolated from  
183 the lungs by lavage [7, 8] (Table 2). These correlations make sense, because we would  
184 expect common regulatory pathways that govern growth in the lung environment. It is  
185 probable that the incomplete overlap between these profiles is due to changes in the  
186 microenvironment that the organism experiences as it invades the lung parenchyma and  
187 is attacked by phagocytes.

188           The FET comparison also identified some *in vitro* growth conditions that induced  
189 transcriptional profiles that were similar to what was induced by invasive growth in the  
190 lungs. While *in vitro* growth in the presence of serum correlated with invasive growth *in*  
191 *vivo*, the most significant correlations were with gene expression in organisms grown in  
192 AMM that was limited in nitrogen, iron, zinc, or combinations of the three (Table 2).  
193 These correlations also make sense, because all invasive pathogens must combat  
194 nutritional immunity imposed by the host. Our data thus fit well with current  
195 understanding of *A. fumigatus* infection biology. In addition, these data indicate growing  
196 *A. fumigatus* in AMM that is deficient in nitrogen, iron and/or zinc induces a  
197 transcriptional response that is quite similar to that induced by invasive growth in the  
198 lungs.

199

## 200 **Analysis of deletion mutants to assess transcription factor function in invasive** 201 **aspergillosis**

202 We sought to use our expression profiling data to prioritize TF genes for functional  
203 analysis during invasive aspergillosis. We chose a set of 9 *A. fumigatus* genes that were  
204 either highly expressed or highly upregulated during invasive growth in the lung, and  
205 whose functions had not been reported previously (Table 3). We created a deletion  
206 mutant for each gene and tested the mutants for proliferation in the mouse model of

207 invasive aspergillosis. In this screen, proliferation was assayed by NanoString  
208 measurement of *A. fumigatus* rRNA levels relative to mouse housekeeping gene RNA  
209 (*ACTB*, *GAPDH*, and *PPIA*) levels in whole lung homogenates. The  $\Delta rlmA$  mutant  
210 displayed 10-fold lower levels of *A. fumigatus* rRNA than the wild-type strain or any other  
211 mutant (Fig 2). The  $\Delta ace1$  mutant displayed rRNA levels comparable to those of the  
212 wild-type strain, but the lung tissue of the mice infected with the  $\Delta ace1$  mutant appeared  
213 to be notably healthier compared to that of mice infected with the wild-type strain.  
214 Therefore, we chose to pursue analysis of *rlmA* and *ace1* during infection.

215

### 216 **RlmA is required for proliferation in the lung during invasive aspergillosis**

217 RlmA is a putative MADS-box transcription factor whose orthologs in many ascomycetes  
218 function in cell wall integrity. *rlmA* RNA levels were down-regulated in the lung germling  
219 datasets at 4, 8, and 12 hours post-infection, then began to increase slightly at 16 hours  
220 [7]. We found that *rlmA* was up-regulated in our invasive infection datasets at 2, 4, and 5  
221 days post-infection (Table 3). These results led us to the simple hypothesis that RlmA  
222 may be required specifically for invasive infection. It is neither up- nor down-regulated 2-  
223 fold in any of the *in vitro* published datasets we collected. This observation suggested to  
224 us that *rlmA* may be regulated by a signal that is distinctive of the invasive infection  
225 environment.

226 To test RlmA function during invasive aspergillosis, we characterized a  $\Delta rlmA$   
227 deletion mutant in the Af293 background. Mice infected with the  $\Delta rlmA$  mutant survived  
228 significantly longer than those infected with the wild-type or  $\Delta rlmA+rlmA$  complemented  
229 strains (Fig 3A). This result indicates that RlmA is required for proliferation in the lung  
230 and pathogenicity in mice immunosuppressed with corticosteroids. Recently, another  
231 group reported RlmA is a member of the cell wall integrity pathway in *A. fumigatus* and  
232 required for virulence in neutropenic mice [42].

233 **Ace1 governs production of secondary metabolites and toxins during invasive**  
234 **aspergillosis**

235 Ace1 is a C<sub>2</sub>H<sub>2</sub> zinc finger protein whose *A. nidulans* ortholog, *sltA*, governs ion  
236 homeostasis, growth under alkaline pH, and sporulation [43, 44]. We constructed an *A.*  
237 *fumigatus*  $\Delta ace1$  mutant, and found that it grew comparably to the wild-type strain in the  
238 presence of high cations and at pH 8 (Supplemental Figure 2). The  $\Delta ace1$  mutant also  
239 sporulated similarly to the wild-type strain. Although the  $\Delta ace1$  mutant had increased  
240 susceptibility to cell membrane stress caused by protamine and SDS, it had wild-type  
241 susceptibility to Congo red, caspofungin, calcofluor white, and hydrogen peroxide  
242 protamine (Fig 4). The  $\Delta ace1$  mutant had reduced capacity to adhere to, invade, and  
243 damage the A549 pulmonary epithelial cell line, but had wild-type susceptibility to  
244 macrophage killing (Fig 5). These results suggest that Ace1 governs the response to  
245 cell membrane stress and the capacity of *A. fumigatus* to damage host cells.

246 In the mouse model of invasive aspergillosis, our rRNA-based titer measurement  
247 described above indicated that the  $\Delta ace1$  and wild-type strains proliferated to similar  
248 levels in the lung at day 5 post-infection (Fig 2). However, gross inspection of the  $\Delta ace1$   
249 infected lungs suggested that there was less fungal-induced damage. This observation  
250 led to the hypothesis that Ace1 may be required for specific pathogenicity functions  
251 during invasive aspergillosis rather than for proliferation.

252 We tested that hypothesis by monitoring mouse survival post-infection in our  
253 non-neutropenic invasive aspergillosis model (Figure 3B). We observed that  $\Delta ace1$ -  
254 infected mice survived significantly longer than mice infected with the wild-type strain or  
255 the  $\Delta ace1+ace1$  complemented strain. The finding that mice infected with the  $\Delta ace1$   
256 mutant maintained a high pulmonary fungal burden yet had reduced mortality is similar  
257 to what has been found with *A. fumigatus* mutants with defects in secondary metabolite

258 production [12, 31], suggesting that Ace1 may govern the expression of secondary  
259 metabolite genes.

260 To identify Ace1 target genes that might be responsible for the virulence, we  
261 performed RNA-seq analysis of the wild-type and  $\Delta ace1$  mutant strains grown in AMM  
262 with low nitrogen and low zinc to mimic the conditions during invasive infection in the  
263 lung. In *Aspergillus* spp., genes encoding proteins involved in the biosynthesis of  
264 secondary metabolites are frequently located in contiguous clusters in the genome. A  
265 total of 33 non-overlapping secondary metabolite gene clusters have been identified in  
266 *A. fumigatus* Af293 [45]. We found that Ace1 governs the expression of at least 50% of  
267 the genes in 16 of these biosynthetic gene clusters (Fig 6, S2 Table). Of these gene  
268 clusters, 10 had reduced mRNA expression in the  $\Delta ace1$  mutant, 3 had increased  
269 mRNA expression, and 3 had both increased and decreased mRNA expression. In the  
270  $\Delta ace1$  mutant, there was also reduced expression of *aspf1* (Afu5g02330), which  
271 encodes a ribotoxin that enhances *A. fumigatus* virulence [12, 37] (S2 Table). We  
272 verified the low levels of *aspf1* mRNA in the  $\Delta ace1$  mutant by qPCR (Fig 7A). These  
273 results indicate that a principal function of Ace1 is the regulation of production of  
274 secondary metabolites and mycotoxins.

275 A major regulator of secondary metabolite production in *A. fumigatus* is LaeA,  
276 which removes heterochromatic marks from the promoters of numerous genes, enabling  
277 the transcription of secondary metabolite genes [45, 46]. Microarray analysis indicates  
278 that LaeA governs the expression of at least 16 secondary metabolite gene clusters [45,  
279 46]. Comparison of the microarray analysis of the  $\Delta laeA$  mutant with the current RNA-  
280 seq analysis of the  $\Delta ace1$  mutant indicates that Ace1 governs the expression of 6  
281 biosynthetic gene clusters that are not known to be regulated by LaeA (Fig 6). LaeA and  
282 Ace1 differ in additional respects. All gene clusters that are regulated by LaeA are down-  
283 regulated in the  $\Delta laeA$  mutant [46], whereas some gene clusters that are regulated by

284 *Ace1*, such as fusarinine C, neosartoricin, and fumitremorgin, are up-regulated in the  
285  $\Delta ace1$  mutant. Also, *LaeA* governs asexual development and conidiation [45, 47],  
286 whereas we found no evidence that *Ace1* governs these processes. These results  
287 suggest that *Ace1* regulates the expression of secondary metabolite gene clusters by a  
288 different mechanism than *LaeA*.

289 To further investigate the relationship between *Ace1* and *LaeA*, we used qPCR to  
290 measure the transcript levels of TF genes in the  $\Delta ace1$  and  $\Delta laeA$  mutant. The transcript  
291 levels of *laeA* were slightly higher in the  $\Delta ace1$  mutant than in the wild-type strain, but  
292 this difference was not significant (Fig 7B). Also, *ace1* was expressed at wild-type levels  
293 in the  $\Delta laeA$  mutant (Fig 7C). Overall, these data indicate that *Ace1* regulates secondary  
294 metabolite gene clusters independently of *LaeA*.

295

### 296 ***Ace1* governs virulence via *Asp f1***

297 The RNA-seq data suggested that the  $\Delta ace1$  mutant had reduced virulence because of  
298 decreased production of mycotoxins. We investigated whether ergot alkaloids produced  
299 by the fumigaclavine biosynthesis cluster play a role in *A. fumigatus* virulence. The first  
300 enzyme in the fumigaclavine biosynthesis pathway is *DmaW* [48] and deletion of *dmaW*  
301 results in absent production of all detectable ergot alkaloids and attenuated virulence in  
302 *Galleria mellonella* [49]. We constructed a  $\Delta dmaW$  mutant and analyzed its virulence in  
303 corticosteroid treated mice. The survival of mice infected with this mutant was similar to  
304 that of mice infected with the wild-type strain (Fig 8A), indicating that the reduced  
305 virulence of the  $\Delta ace1$  mutant was not due to the absence of ergot alkaloid production.

306 Another gene cluster that was down-regulated in the  $\Delta ace1$  mutant was the large  
307 fumagillin and pseruotin supercluster. Fumagillin inhibits neutrophil function [50] and is  
308 required for *A. fumigatus* to cause maximal damage to the A549 pulmonary epithelial cell  
309 line [51]. Within the fumagillin biosynthetic gene cluster is *fumR*, which specifies a

310 putative C6 type transcription factor that is required for fumagillin and pseurotin  
311 synthesis [38, 39]. We constructed a  $\Delta$ *fumR* mutant and found that it had wild-type  
312 virulence in mice (Fig 8B). A  $\Delta$ *fumR*  $\Delta$ *dmaW* double mutant also had no detectable  
313 reduction in virulence (Fig 8B). Collectively, these data suggest that both fumagillin and  
314 the fumigaclavine ergot alkaloids are dispensable for virulence in the corticosteroid  
315 treated mouse model of invasive aspergillosis. Thus, the decreased production of these  
316 secondary metabolites does not explain the reduced virulence of the  $\Delta$ *ace1* mutant.

317         Next, we investigated whether the attenuated virulence of the  $\Delta$ *ace1* mutant was  
318 due to decreased expression of *aspf1*, which encodes a ribotoxin [37]. Previously, we  
319 have determined that Asp f1 is required for the maximal virulence of *A. fumigatus* in  
320 corticosteroid treated mice [12]. We constructed a variant of the  $\Delta$ *ace1* mutant in which  
321 the expression of *aspf1* was driven by the constitutive *gpdA* promoter (Fig 7A). The  
322 forced expression of *aspf1* restored the virulence of the  $\Delta$ *ace1* mutant to wild-type levels  
323 (Fig 8C). Thus, the reduced expression of *aspf1* likely accounts for the decreased  
324 virulence of the  $\Delta$ *ace1* mutant.

325         Collectively, our results indicate that invasive growth in the lungs of corticosteroid  
326 treated mice induces a unique transcription profile in *A. fumigatus* as the organism  
327 responds to nutrient limitation and attack by host phagocytes. Also, growth in AMM with  
328 low zinc and low nitrogen *in vitro* induces a transcriptional response that largely mimics  
329 that induced by growth *in vivo*. This set of conditions can be used for RNA-seq analysis  
330 of *A. fumigatus* TF gene mutants to identify potential downstream target genes whose  
331 products mediate virulence. NanoString profiling of *A. fumigatus* during invasive growth  
332 in the lungs identified RlmA as a transcription factor that governs proliferation *in vivo*. It  
333 also identified Ace1 as a transcription factor that governs pathogenicity by regulating the  
334 expression of multiple secondary metabolite gene clusters and *aspf1* independently of  
335 LaeA. In our NanoString dataset are additional TF genes that are either up-regulated or

336 highly expressed during invasive growth *in vivo*. Determining the roles of these genes in  
337 governing *A. fumigatus* virulence is currently in progress.

338

## 339 **Methods**

### 340 **Ethics statement**

341 All mouse studies were conducted in compliance with the NIH Guide for the Care and  
342 Use of Laboratory Animals. The experimental procedures were approved in advance by  
343 the Institutional Animal Care and Use Committee at the Lundquist Institute. The mice  
344 were group-housed according to experimental group in HEPA-filtered laminar flow cages  
345 with unrestricted access to food and water. The vivarium is managed by the Lundquist  
346 Institute in compliance with all policies and regulations of the Office of Laboratory Animal  
347 Welfare of the Public Health Service. The facility is fully accredited by the American  
348 Association for Laboratory Animal Care.

349

### 350 **Strains, media and growth conditions**

351 The *A. fumigatus* strains used in this study are listed in Table 4. All strains were grown  
352 on Sabouraud dextrose agar (Difco) at 37°C for 7 d prior to use. Conidia were harvested  
353 with phosphate-buffered saline (PBS) containing 0.1% Tween 80 (Sigma-Aldrich) and  
354 enumerated with a hemacytometer.

355 For *in vitro* gene expression profiling analysis,  $1.5 \times 10^8$  conidia of *A. fumigatus*  
356 were added to 300 ml liquid standard AMM or modified AMM (no added iron, no added  
357 zinc, or the addition of 10% fetal bovine serum) and incubated for 24 h at 37°C in a  
358 shaking incubator. For growth under low nitrogen conditions, the *A. fumigatus* cells were  
359 grown in either AMM or modified AMM for 20 h, after which the hyphae were collected  
360 by filtration, washed with water, then added to AMM or modified AMM without nitrate and  
361 incubated for an additional 4 h. At the end of the incubation period, the resulting hyphae



362 were collected by filtration and the RNA was extracted using the RNeasy Plant Minikit  
363 (Qiagen) following the manufacturer's instructions.

364 For RNA-seq analysis,  $1.5 \times 10^8$  conidia of *A. fumigatus* were incubated in 300  
365 ml of AMM without zinc for 20 h and then incubated in AMM without zinc and nitrate for 4  
366 additional h prior to RNA extraction.

367

### 368 **Strain construction**

369 The TF gene mutant strains used in this research were constructed using a split marker  
370 strategy. For each gene, approximately 1.5 kb of the 5'-flanking sequence upstream of  
371 the protein coding region was PCR-amplified from genomic DNA of strain Af293 using  
372 primers F3 and F4. The PCR primers used in the experiments are listed in  
373 Supplemental Table S2. The resulting fragment was cloned into plasmid pNLC106 [52].  
374 Using the plasmid as a template, the 5'-flanking sequence region was linked to the 5'  
375 portion of the *hph* hygromycin resistance gene by fusion PCR using primers F4 and HY.  
376 Next, about 1.5 kb of the 3'-flanking sequence downstream of the protein coding region  
377 was PCR-amplified from genomic DNA of strain A293 using primers F2 and F1 and the  
378 sequence of *hph* was amplified from pAN7 [53] using primers HYG-F and HYG-R. Using  
379 a mixture of the two fragments as the template, the 3'-flanking sequence region of target  
380 gene linked to 3' portion of *hph* was amplified by fusion PCR with primers F1 and YG.  
381 Finally, the two fragments were used to transform Af293 protoplasts. The hygromycin-  
382 resistant clones were screened for the deletion of target gene by colony PCR using  
383 primers Screen-F and Screen-R.

384 To construct the  $\Delta rlmA + rlmA$  complemented strain, a 4481 bp fragment  
385 containing the *rlmA* protein coding sequence and approximately 2 kb of 5' flanking  
386 sequence and 0.5 kb of 3' flanking sequence was PCR-amplified from Af293 genomic  
387 DNA using primers 3g08520-Com-F and 3g08520-Com-R. Similarly, to construct the

388  $\Delta ace1+ace1$  complemented strain, a 4997 bp fragment containing the *ace1* protein  
389 coding sequence and flanking regions was PCR-amplified from using primers 3g08010-  
390 Com-F and 3g08010-Com-R. Each fragment was cloned into the NotI/XbaI sites of  
391 plasmid p402 [54]. The resulting plasmids were used to transform the  $\Delta rlmA$  and  $\Delta ace1$   
392 strain. To confirm the presence of the complementation plasmids, the phleomycin-  
393 resistant colonies were screened by colony PCR using primers 3g08520-Com-F and  
394 3g08520-Com-R to detect *rlmA* or 3g08010-Com-F and 3g08010-Com-R to detect *ace1*.  
395 The transcript levels of *rlmA* or *ace1* in various clones were quantified by real-time RT-  
396 PCR using primers RT-F and RT-R. The clones in which the transcript levels of *rlmA* or  
397 *ace1* was most similar to that of the wild-type strain was used in all experiments.

398 For use in the epithelial cell invasion assays, strains of *A. fumigatus* that  
399 expressed GFP were constructed. The  $\Delta ace1$  mutant was transformed with plasmid  
400 GFP-Phleo and the  $\Delta ace1+ace1$  complemented strain was transformed with plasmid  
401 GFP-pPTRI [55].

402 To construct the  $\Delta dmaW$  (Afu2g18040) and  $\Delta fumR$  (Afu8g00420) deletion  
403 mutants, a transient CRISPR-Cas9 gene deletion system was used [56, 57]. The Cas9  
404 expression cassette was amplified from plasmid pFC331 [57], using primers Cas9-F and  
405 Cas9-R. To construct the sgRNA expression cassette, two DNA fragments were  
406 amplified from plasmid pFC334 [57] using primers sgRNA-F and sgRNA-ss-R, and  
407 sgRNA-R, sgRNA-ss-F. Next, the sgRNA expression cassette was amplified by fusion  
408 PCR from the two DNA fragments, using primers sgRNA-F and sgRNA-R. The  
409 hygromycin resistance (HygR) repair template was amplified from plasmid pVG2.2-hph  
410 [58] using primers Hyg-F and Hyg-R, which had about 50 bp of homology to the 5' end of  
411 the protein coding sequence of the gene and the 3' end of the protein coding sequence,  
412 respectively. The HygR repair template was mixed with the Cas9 cassette and the two  
413 sgRNA cassettes and then used for protoplast transformation. Hygromycin resistant

414 clones were screened for deletion of target gene by colony PCR using primers RT-F and  
415 RT-R. The positive clones were also confirmed for absence of integration of DNA  
416 encoding Cas9 or the gRNA, using primers Cas9RT-F and Cas9RT-R, and sgRT-F,  
417 sgRT-R.

418         The  $\Delta fumR \Delta dmaW$  double mutant was constructed using the above CRISPR-  
419 Cas9 approach starting with the  $\Delta dmaW$  mutant strain. The phleomycin (PhIR) repair  
420 template was amplified from plasmid p402 using primers Phleo-F and Phleo-R, which  
421 contained regions that were homologous to the 5' and 3' ends of the *fumR* protein  
422 coding sequence. Protoplasts were transformed with the repair template along with the  
423 Cas9 and sgRNA cassettes that were used to construct the  $\Delta fumR$  deletion mutant.  
424 Phleomycin resistant clones were screened by colony PCR to identify ones with deletion  
425 of both genes and that lacked Cas9 and sgRNA sequences.

426         A strain of the  $\Delta ace1$  mutant in which *aspf1* expression was driven by the *gpdA*  
427 promoter was constructed using the CRISPR-Cas9 system. The protein coding region of  
428 *aspf1* was amplified from genomic DNA using primers Aspf1-F and Aspf1-R. The  
429 resulting fragment was cloned into the *BamHI-NcoI* sites of plasmid pGFP-phleo using  
430 the NEBuilder DNA assembly kit (New England Biolabs). In this plasmid, the expression  
431 of *aspf1* was driven by the *A. nidulans gpdA* promoter. The *gpdA-aspf1*-phleomycin  
432 template was PCR amplified from this plasmid using primers Phleo-OE-F and Phleo-OE-  
433 R (Supplemental Table S1), which had about 50 bp of homology to the safe haven  
434 region of the *A. fumigatus* genome [59]. The  $\Delta ace1$  mutant was transformed with the  
435 *gpdA-aspf1*-phleomycin template, the Cas9 cassette and the two safe haven sgRNA  
436 cassettes [59]. In the resulting phleomycin resistant clones, the *aspf1* transcript levels  
437 were quantified by real-time RT-PCR using primers Aspf1-RT-F and Aspf1-RT-R. A  
438 clone in which the *aspf1* mRNA expression was approximately 4-fold higher than the  
439 wild-type strain was used in all subsequent experiments.

## 440 **Mouse model of invasive pulmonary aspergillosis**

441 A non-neutropenic, immunosuppressed mouse model of invasive aspergillosis was used  
442 to assess the transcriptional profile and virulence of the various strains [19]. Briefly, 6  
443 week old, male Balb/c mice (Taconic Laboratories) were immunosuppressed with 7.5 mg  
444 cortisone acetate (Sigma-Aldrich) administered subcutaneously every other day starting  
445 at day -4 before infection for a total of 5 doses. To prevent bacterial infections,  
446 enrofloxacin (Baytril, Western Medical Supply) was added to the drinking water at a final  
447 concentration of 0.005% on day -5 relative to infection. The mice were infected by  
448 placing them for 1 h in an acrylic chamber into which 12 ml of  $1 \times 10^9$  conidia/ml were  
449 aerosolized. Control mice were immunosuppressed, but not infected.

450 For the transcriptional profiling experiments, 3 mice infected with each strain  
451 were sacrificed after 2, 4, and 5 days infection. Their lungs were harvested and snap  
452 frozen in liquid nitrogen for RNA extraction. To isolate fungal RNA from the infected  
453 mouse lungs, the RNeasy minikit (Qiagen) was used with modifications [12].  
454 Approximately 2.4 ml of buffer RLT with 1%  $\beta$ -mercaptoethanol was added to the lungs  
455 from each mouse and the tissue was homogenized in an M tube (Miltenyi Biotec) using a  
456 gentleMACS dissociator (Miltenyi Biotec) on setting RNA\_02.01. Next, the homogenate  
457 was mixed with an equal volume of phenol-chloroform-isoamyl alcohol (25:24:1) and a  
458 half volume of zirconium beads (Ambion) and then vortexed with a Mini-Beadbeater  
459 (Biospec Products) for 3 min. After centrifugation, the aqueous phase was collected and  
460 mixed with an equal volume of 70% ethanol. The RNA was isolated from this mixture  
461 using an RNeasy spin column (Qiagen) following the manufacturer's instructions.

462 To assess the virulence of the various *A. fumigatus* strains using survival as the  
463 end point, 11 mice were infected with each strain. Shortly after infection, 3 mice from  
464 each group were sacrificed, and their lungs were harvested, homogenized and  
465 quantitatively cultured to verify conidia delivery to the lung. The remaining mice were

466 monitored twice daily for survival. 5 mice that were immunosuppressed, but not infected  
467 were included as a negative control.

468

#### 469 **NanoString analysis**

470 A NanoString nCounter digital analyzer was used for transcriptional profiling of *A.*  
471 *fumigatus* Af293 both *in vivo* and *in vitro* as previously described [12]. For each  
472 condition, the adjusted data were normalized to total probe counts. However, when we  
473 compared 18 genes that were in common between our two probe sets (called TF and  
474 ER), we observed poor agreement in fold changes. The ER genes had been chosen  
475 because they respond dramatically to environmental changes, and we reasoned that  
476 large expression changes may make total counts unreliable for normalization. The TF  
477 probe set, representing 400 different putative transcription factor genes, is extremely  
478 diverse and thus total counts are more reliable for normalization. With that point in mind,  
479 the ER datasets were renormalized to TF dataset measurements as follows. For each of  
480 the 18 common genes in both ER and TF probe sets, we calculated the ratio of mean TF  
481 counts/mean ER counts for each growth condition. Then the median ratio for the 18  
482 genes was used to calculate a normalization factor for each growth condition. The  
483 normalization factor for each growth condition was applied to all ER genes. Finally, the  
484 TF and ER datasets were combined, with counts for common genes from the TF  
485 datasets, and 10 TF genes with the lowest counts removed. Each condition was tested  
486 in 3 biological replicates and the expression ratios were calculated using the mean  
487 values. Genes were considered differentially expressed when there was at least a 2-fold  
488 change in the transcript levels and an unpaired, two-tailed student's t-test p-value  $\leq 0.05$ .

489

490

491 **RNA-seq**

492 RNA-seq libraries (strand-agnostic, 150 bp paired-end) were generated from total  
493 fungal RNA by Novogene Corporation Inc. Sequencing reads were aligned to the  
494 reference *A. fumigatus* Af293 genome using HISAT2 [60] and alignment files  
495 were used to generate read counts for each gene using HTseq [61]. We obtained  
496 an average of 46.4 million aligned reads per sample. Statistical analysis of  
497 differential gene expression was performed using the DEseq package from  
498 Bioconductor [62]. A gene was considered differentially expressed if the FDR  
499 value for differential expression was below 0.05. The RNA-seq analysis was  
500 performed in biological triplicate. The raw RNA-seq data will be deposited at the  
501 NCBI Short Read Archive (SRA) data base.

502

503 **Stress assays**

504 To test the susceptibility of the various strains to cell wall, cell membrane, oxidant, and  
505 ionic stress, serial 10-fold dilutions of conidia ranging from  $10^5$  to  $10^2$  cells in a volume of  
506 5  $\mu$ l were spotted onto AMM agar plates supplemented with 5 mM protamine (Sigma-  
507 Aldrich), 0.01% SDS (Sigma), 40  $\mu$ g/ml caspofungin (Bellavida Pharmacy), 200  $\mu$ g/ml  
508 Congo red (Sigma-Aldrich), 300  $\mu$ g/ml Calcofluor White (Sigma-Aldrich), 4 mM  $H_2O_2$ ,  
509 200 mM KCl, 200 mM  $MgCl_2$ , 200 mM NaCl, or 50 mM  $CaCl_2$ . To determine growth at  
510 alkaline pH, the conidia were spotted onto AMM agar adjusted to pH 8.0 with NaOH.  
511 Fungal growth was analyzed after incubation at 37°C for 2 d.

512

513 **Real-time PCR**

514 The total RNA was reverse transcribed into cDNA using Moloney murine leukemia virus  
515 reverse transcriptase (Promega). Real-time PCR was performed using the POWER

516 SYBR green PCR master mix (Applied Biosystems) and an ABI 7000 thermocycler  
517 (Applied Biosystems). Gene transcript levels were quantified by  $\Delta\Delta C^t$  method, using  
518 GAPDH as the endogenously expressed gene [63].

519

## 520 **Host cell interaction assays**

521 The capacity of the various strains to adhere to, invade, and damage the A549  
522 pulmonary epithelial cell line (American Type Culture Collection) was determined using  
523 our previously described methods [11, 55, 64]. To measure adherence and invasion,  $10^5$   
524 germlings of the various GFP-expressing strains of *A. fumigatus* in F12k medium  
525 (American Type Culture Collection) were added to A549 cells that had been grown to  
526 confluency in 24-well tissue culture plates containing fibronectin coated circular glass  
527 coverslips in each well. After incubation for 2.5 h, the cells were rinsed with 1 ml HBSS  
528 in a standardized manner and then fixed with 3% paraformaldehyde. The  
529 noninternalized portions of the organisms were stained with a polyclonal rabbit anti-*A.*  
530 *fumigatus* primary antibody (Meridian Life Science, Inc.) followed by an AlexaFluor 568-  
531 labeled secondary antibody (Life Technologies). After the coverslips were mounted  
532 inverted on microscope slides, they were viewed by epifluorescence. The number of cell-  
533 associated organisms was determined by counting the number of GFP-expressing  
534 organisms per high-powered field (HPF). The number of endocytosed organisms was  
535 determined by subtracting the number of non-internalized organisms (which fluoresced  
536 red) from the number of cell-associated organisms. At least 100 organisms per coverslip  
537 were scored and each strain was tested in triplicate in three independent experiments.

538 Our standard  $^{51}\text{Cr}$  release assay was used to evaluate the capacity of the various  
539 strains to damage the A549 cell line [11, 65]. The A549 cells were grown to confluency  
540 in a 24-well tissue culture plate and then loaded with  $^{51}\text{Cr}$  overnight. After rinsing the  
541 cells to remove the unincorporated  $^{51}\text{Cr}$ , the cells were infected with  $5 \times 10^5$  conidia of

542 each strain in F12K medium. After 16 h of infection, the medium above the cells was  
543 collected and the cells were lysed with 6 N NaOH. The lysed cells were collected by  
544 rinsing the wells twice with RadiacWash (Biodex Medical Systems). The amount of  $^{51}\text{Cr}$   
545 in the medium and the cell lysate was measured using a gamma counter. The  
546 spontaneous release of  $^{51}\text{Cr}$  was determined using uninfected A549 cells that were  
547 processed in parallel. The specific release of  $^{51}\text{Cr}$  was calculated using our previous  
548 described formula [11, 65]. Each experiment was performed in triplicate and repeated  
549 three times.

550 The susceptibility of the various *A. fumigatus* strains to phagocyte killing was  
551 determined using bone marrow-derived macrophages (BMDMs), which were isolated  
552 from 6-week-old mice (Taconic Laboratories). The cells were differentiated into  
553 macrophages by incubation with 50 ng/ml macrophage colony–stimulating factor (M-  
554 CSF) (BioLegend) in Dulbecco's Modified Eagle's Medium (DMEM) (American Type  
555 Culture Collection) with 10% fetal bovine serum (Gemini Bio-Products), 1% streptomycin  
556 and penicillin for 10 d [66]. The day before the experiment, the adherent cells were  
557 harvested and  $10^6$  cells were seeded into each well of a 6-well tissue culture plate. The  
558 next day,  $5 \times 10^4$  conidia were added to each well and incubated for 8 h. A similar  
559 number of conidia was added to a second 6-well tissue culture plate without BMDMs as  
560 a control. At the end of the incubation period, the BMDMs were lysed with distilled water  
561 and sonication. The contents of the wells were aspirated and quantitatively cultured on  
562 Sabouraud dextrose agar. For each strain, the percentage of *A. fumigatus* cells killed  
563 was calculated by the formula:  $1 - \frac{\text{number of colonies in the wells containing BMDMs}}{\text{number of colonies in the wells without BMDMs}}$ . Each experiment was performed in  
564 triplicates and repeated three times.

566

567



568 **Statistical analysis**

569 The data from the in vitro experiments were analyzed by the two-tailed Student's t-test  
570 assuming unequal variance or one way analysis of variance followed by the Dunnett's  
571 test for multiple comparisons. The survival data were analyzed using the Log-Rank test.  
572 A *P*-value of  $\leq 0.05$  was considered to be significant.

573

574 **ACKNOWLEDGEMENTS**

575 We thank the members of the Filler, Bruno, and Mitchell labs for helpful discussions and  
576 suggestions.

577

578 **REFERENCES**

579

- 580 1. Dagenais TR, Keller NP. Pathogenesis of *Aspergillus fumigatus* in invasive  
581 aspergillosis. Clin Microbiol Rev. 2009;22(3):447-65. Epub 2009/07/15. doi: 22/3/447 [pii]  
582 10.1128/CMR.00055-08. PubMed PMID: 19597008; PubMed Central PMCID:  
583 PMC2708386.
- 584 2. Segal BH. Aspergillosis. N Engl J Med. 2009;360(18):1870-84. Epub 2009/05/01.  
585 doi: 360/18/1870 [pii]  
586 10.1056/NEJMra0808853. PubMed PMID: 19403905.
- 587 3. Sherif R, Segal BH. Pulmonary aspergillosis: clinical presentation, diagnostic  
588 tests, management and complications. Curr Opin Pulm Med. 2010;16(3):242-50. Epub  
589 2010/04/09. doi: 10.1097/MCP.0b013e328337d6de  
590 00063198-201005000-00012 [pii]. PubMed PMID: 20375786; PubMed Central PMCID:  
591 PMC3326383.
- 592 4. Walsh TJ, Anaissie EJ, Denning DW, Herbrecht R, Kontoyiannis DP, Marr KA, et  
593 al. Treatment of aspergillosis: clinical practice guidelines of the Infectious Diseases  
594 Society of America. Clin Infect Dis. 2008;46(3):327-60. Epub 2008/01/08. doi:  
595 10.1086/525258. PubMed PMID: 18177225.
- 596 5. Georgiadou SP, Kontoyiannis DP. The impact of azole resistance on  
597 aspergillosis guidelines. Ann N Y Acad Sci. 2012;1272:15-22. Epub 2012/12/13. doi:  
598 10.1111/j.1749-6632.2012.06795.x. PubMed PMID: 23231710.
- 599 6. Pfaller MA. Antifungal drug resistance: mechanisms, epidemiology, and  
600 consequences for treatment. Am J Med. 2012;125(1 Suppl):S3-13. Epub 2012/01/04.  
601 doi: S0002-9343(11)00913-2 [pii]  
602 10.1016/j.amjmed.2011.11.001. PubMed PMID: 22196207.
- 603 7. Bertuzzi M, Schrettl M, Alcazar-Fuoli L, Cairns TC, Munoz A, Walker LA, et al.  
604 The pH-responsive PacC transcription factor of *Aspergillus fumigatus* governs epithelial  
605 entry and tissue invasion during pulmonary aspergillosis. PLoS Pathog.  
606 2014;10(10):e1004413. Epub 2014/10/21. doi: 10.1371/journal.ppat.1004413. PubMed  
607 PMID: 25329394; PubMed Central PMCID: PMCPMC4199764.
- 608 8. McDonagh A, Fedorova ND, Crabtree J, Yu Y, Kim S, Chen D, et al. Sub-  
609 telomere directed gene expression during initiation of invasive aspergillosis. PLoS  
610 Pathog. 2008;4(9):e1000154. PubMed PMID: 18787699.
- 611 9. Kale SD, Ayubi T, Chung D, Tubau-Juni N, Leber A, Dang HX, et al. Modulation  
612 of immune signaling and metabolism highlights host and fungal transcriptional responses  
613 in mouse models of invasive pulmonary aspergillosis. Sci Rep. 2017;7(1):17096. Epub  
614 2017/12/08. doi: 10.1038/s41598-017-17000-1. PubMed PMID: 29213115; PubMed  
615 Central PMCID: PMCPMC5719083.
- 616 10. Abad A, Fernandez-Molina JV, Bikandi J, Ramirez A, Margareto J, Sendino J, et  
617 al. What makes *Aspergillus fumigatus* a successful pathogen? Genes and molecules  
618 involved in invasive aspergillosis. Rev Iberoam Micol. 2010;27(4):155-82.

- 619 11. Pongpom M, Liu H, Xu W, Snarr BD, Sheppard DC, Mitchell AP, et al. Divergent  
620 targets of *Aspergillus fumigatus* AcuK and AcuM transcription factors during growth in  
621 vitro versus invasive disease. *Infect Immun*. 2015;83(3):923-33.
- 622 12. Liu H, Xu W, Solis NV, Woolford C, Mitchell AP, Filler SG. Functional  
623 convergence of gliP and aspf1 in *Aspergillus fumigatus* pathogenicity. *Virulence*.  
624 2018;9(1):1062-73.
- 625 13. Xu W, Solis NV, Ehrlich RL, Woolford CA, Filler SG, Mitchell AP. Activation and  
626 alliance of regulatory pathways in *C. albicans* during mammalian infection. *PLoS Biol*.  
627 2015;13(2):e1002076.
- 628 14. Fanning S, Xu W, Solis N, Woolford CA, Filler SG, Mitchell AP. Divergent targets  
629 of *Candida albicans* biofilm regulator Bcr1 in vitro and in vivo. *Eukaryot Cell*.  
630 2012;11:896-904. Epub 2012/05/01. doi: 10.1128/EC.00103-12. PubMed PMID:  
631 22544909.
- 632 15. Nobile CJ, Solis N, Myers CL, Fay AJ, Deneault JS, Nantel A, et al. *Candida*  
633 *albicans* transcription factor Rim101 mediates pathogenic interactions through cell wall  
634 functions. *Cell Microbiol*. 2008;10(11):2180-96. PubMed PMID: 18627379.
- 635 16. Nobile CJ, Andes DR, Nett JE, Smith FJ, Yue F, Phan QT, et al. Critical role of  
636 Bcr1-dependent adhesins in *C. albicans* biofilm formation in vitro and in vivo. *PLoS*  
637 *Pathog*. 2006;2(7):e63. PubMed PMID: 16839200.
- 638 17. Davis DA, Bruno V, Loza L, Filler SG, Mitchell AP. *C. albicans* Mds3p, a  
639 conserved regulator of pH responses and virulence identified through insertional  
640 mutagenesis. *Genetics*. 2002;162(4):1573-81. PubMed PMID: 12524333.
- 641 18. Bahn YS. Exploiting fungal virulence-regulating transcription factors as novel  
642 antifungal drug targets. *PLoS Pathog*. 2015;11(7):e1004936. Epub 2015/07/17. doi:  
643 10.1371/journal.ppat.1004936. PubMed PMID: 26181382; PubMed Central PMCID:  
644 PMC4504714.
- 645 19. Chiang LY, Sheppard DC, Gravelat FN, Patterson TF, Filler SG. *Aspergillus*  
646 *fumigatus* stimulates leukocyte adhesion molecules and cytokine production by  
647 endothelial cells in vitro and during invasive pulmonary disease. *Infect Immun*.  
648 2008;76(8):3429-38. PubMed PMID: 18490455.
- 649 20. Sheppard DC, Rieg G, Chiang LY, Filler SG, Edwards JE, Jr., Ibrahim AS. Novel  
650 inhalational murine model of invasive pulmonary aspergillosis. *Antimicrob Agents*  
651 *Chemother*. 2004;48(5):1908-11. PubMed PMID: 15105158.
- 652 21. Schrettl M, Kim HS, Eisendle M, Kragl C, Nierman WC, Heinekamp T, et al.  
653 SreA-mediated iron regulation in *Aspergillus fumigatus*. *Mol Microbiol*. 2008;70(1):27-43.  
654 PubMed PMID: 18721228.
- 655 22. Schrettl M, Beckmann N, Varga J, Heinekamp T, Jacobsen ID, Jochl C, et al.  
656 HapX-mediated adaption to iron starvation is crucial for virulence of *Aspergillus*  
657 *fumigatus*. *PLoS Pathog*. 2010;6(9):1001124.
- 658 23. Schrettl M, Bignell E, Kragl C, Joechl C, Rogers T, Arst HN, Jr., et al.  
659 Siderophore biosynthesis but not reductive iron assimilation is essential for *Aspergillus*  
660 *fumigatus* virulence. *J Exp Med*. 2004;200(9):1213-9.

- 661 24. Moreno MA, Ibrahim-Granet O, Vicente-franqueira R, Amich J, Ave P, Leal F, et  
662 al. The regulation of zinc homeostasis by the ZafA transcriptional activator is essential  
663 for *Aspergillus fumigatus* virulence. *Mol Microbiol.* 2007;64(5):1182-97. Epub  
664 2007/06/05. doi: 10.1111/j.1365-2958.2007.05726.x. PubMed PMID: 17542914.
- 665 25. Hensel M, Arst HN, Jr., Aufauvre-Brown A, Holden DW. The role of the  
666 *Aspergillus fumigatus* areA gene in invasive pulmonary aspergillosis. *Mol Gen Genet.*  
667 1998;258(5):553-7. Epub 1998/07/21. PubMed PMID: 9669338.
- 668 26. Willger SD, Puttikamonkul S, Kim KH, Burritt JB, Grahl N, Metzler LJ, et al. A  
669 sterol-regulatory element binding protein is required for cell polarity, hypoxia adaptation,  
670 azole drug resistance, and virulence in *Aspergillus fumigatus*. *PLoS Pathog.*  
671 2008;4(11):e1000200. PubMed PMID: 18989462.
- 672 27. Richie DL, Hartl L, Amanianda V, Winters MS, Fuller KK, Miley MD, et al. A role  
673 for the unfolded protein response (UPR) in virulence and antifungal susceptibility in  
674 *Aspergillus fumigatus*. *PLoS Pathog.* 2009;5(1):e1000258. PubMed PMID: 19132084.
- 675 28. Dinamarco TM, Almeida RS, de Castro PA, Brown NA, dos Reis TF, Ramalho  
676 LN, et al. Molecular characterization of the putative transcription factor SebA involved in  
677 virulence in *Aspergillus fumigatus*. *Eukaryot Cell.* 2012;11(4):518-31.
- 678 29. Dirr F, Echtenacher B, Heesemann J, Hoffmann P, Ebel F, Wagener J. AfMkk2 is  
679 required for cell wall integrity signaling, adhesion, and full virulence of the human  
680 pathogen *Aspergillus fumigatus*. *Int J Med Microbiol.* 2010;300(7):496-502.
- 681 30. Ma Y, Qiao J, Liu W, Wan Z, Wang X, Calderone R, et al. The sho1 sensor  
682 regulates growth, morphology, and oxidant adaptation in *Aspergillus fumigatus* but is not  
683 essential for development of invasive pulmonary aspergillosis. *Infect Immun.*  
684 2008;76(4):1695-701.
- 685 31. Spikes S, Xu R, Nguyen CK, Chamilos G, Kontoyiannis DP, Jacobson RH, et al.  
686 Gliotoxin production in *Aspergillus fumigatus* contributes to host-specific differences in  
687 virulence. *J Infect Dis.* 2008;197(3):479-86. PubMed PMID: 18199036.
- 688 32. Balibar CJ, Walsh CT. GliP, a multimodular nonribosomal peptide synthetase in  
689 *Aspergillus fumigatus*, makes the diketopiperazine scaffold of gliotoxin. *Biochemistry.*  
690 2006;45(50):15029-38.
- 691 33. Scharf DH, Remme N, Habel A, Chankhamjon P, Scherlach K, Heinekamp T, et  
692 al. A dedicated glutathione S-transferase mediates carbon-sulfur bond formation in  
693 gliotoxin biosynthesis. *J Am Chem Soc.* 2011;133(32):12322-5.
- 694 34. Bok JW, Chung D, Balajee SA, Marr KA, Andes D, Nielsen KF, et al. GliZ, a  
695 transcriptional regulator of gliotoxin biosynthesis, contributes to *Aspergillus fumigatus*  
696 virulence. *Infect Immun.* 2006;74(12):6761-8.
- 697 35. Smith TD, Calvo AM. The mtfA transcription factor gene controls morphogenesis,  
698 gliotoxin production, and virulence in the opportunistic human pathogen *Aspergillus*  
699 *fumigatus*. *Eukaryot Cell.* 2014;13(6):766-75.
- 700 36. Chooi YH, Fang J, Liu H, Filler SG, Wang P, Tang Y. Genome mining of a  
701 prenylated and immunosuppressive polyketide from pathogenic fungi. *Org Lett.*  
702 2013;15(4):780-3.

- 703 37. Arruda LK, Platts-Mills TA, Fox JW, Chapman MD. *Aspergillus fumigatus*  
704 allergen I, a major IgE-binding protein, is a member of the mitogillin family of cytotoxins.  
705 J Exp Med. 1990;172(5):1529-32.
- 706 38. Dhingra S, Lind AL, Lin HC, Tang Y, Rokas A, Calvo AM. The fumagillin gene  
707 cluster, an example of hundreds of genes under veA control in *Aspergillus fumigatus*.  
708 PLoS ONE. 2013;8(10).
- 709 39. Wiemann P, Guo CJ, Palmer JM, Sekonyela R, Wang CC, Keller NP. Prototype  
710 of an intertwined secondary-metabolite supercluster. Proc Natl Acad Sci U S A.  
711 2013;110(42):17065-70.
- 712 40. Yin WB, Baccile JA, Bok JW, Chen Y, Keller NP, Schroeder FC. A nonribosomal  
713 peptide synthetase-derived iron(III) complex from the pathogenic fungus *Aspergillus*  
714 *fumigatus*. J Am Chem Soc. 2013;135(6):2064-7.
- 715 41. Throckmorton K, Lim FY, Kontoyiannis DP, Zheng W, Keller NP. Redundant  
716 synthesis of a conidial polyketide by two distinct secondary metabolite clusters in  
717 *Aspergillus fumigatus*. Environ Microbiol. 2016;18(1):246-59. Epub 2015/08/06. doi:  
718 10.1111/1462-2920.13007. PubMed PMID: 26242966; PubMed Central PMCID:  
719 PMCPMC4750049.
- 720 42. Rocha MC, Fabri JH, Franco de Godoy K, Alves de Castro P, Hori JI, Ferreira da  
721 Cunha A, et al. *Aspergillus fumigatus* MADS-Box Transcription Factor rlmA Is Required  
722 for Regulation of the Cell Wall Integrity and Virulence. G3 (Bethesda). 2016;6(9):2983-  
723 3002. Epub 2016/07/31. doi: 10.1534/g3.116.031112. PubMed PMID: 27473315;  
724 PubMed Central PMCID: PMCPMC5015955.
- 725 43. Shantappa S, Dhingra S, Hernandez-Ortiz P, Espeso EA, Calvo AM. Role of the  
726 zinc finger transcription factor SitA in morphogenesis and sterigmatocystin biosynthesis  
727 in the fungus *Aspergillus nidulans*. PLoS One. 2013;8(7):e68492. Epub 2013/07/11. doi:  
728 10.1371/journal.pone.0068492. PubMed PMID: 23840895; PubMed Central PMCID:  
729 PMCPMC3698166.
- 730 44. Spielvogel A, Findon H, Arst HN, Araujo-Bazan L, Hernandez-Ortiz P, Stahl U, et  
731 al. Two zinc finger transcription factors, CrzA and SitA, are involved in cation  
732 homeostasis and detoxification in *Aspergillus nidulans*. Biochem J. 2008;414(3):419-  
733 29. Epub 2008/05/13. doi: 10.1042/bj20080344. PubMed PMID: 18471095.
- 734 45. Lind AL, Lim FY, Soukup AA, Keller NP, Rokas A. An LaeA- and BrlA-dependent  
735 cellular network governs tissue-specific secondary metabolism in the human pathogen  
736 *Aspergillus fumigatus*. mSphere. 2018;3(2). Epub 2018/03/23. doi:  
737 10.1128/mSphere.00050-18. PubMed PMID: 29564395; PubMed Central PMCID:  
738 PMCPMC5853485.
- 739 46. Perrin RM, Fedorova ND, Bok JW, Cramer RA, Wortman JR, Kim HS, et al.  
740 Transcriptional regulation of chemical diversity in *Aspergillus fumigatus* by LaeA. PLoS  
741 Pathog. 2007;3(4):e50. PubMed PMID: 17432932.
- 742 47. Bok JW, Balajee SA, Marr KA, Andes D, Nielsen KF, Frisvad JC, et al. LaeA, a  
743 regulator of morphogenetic fungal virulence factors. Eukaryot Cell. 2005;4(9):1574-82.  
744 PubMed PMID: 16151250.
- 745 48. Coyle CM, Panaccione DG. An ergot alkaloid biosynthesis gene and clustered  
746 hypothetical genes from *Aspergillus fumigatus*. Appl Environ Microbiol. 2005;71(6):3112-

- 747 8. Epub 2005/06/04. doi: 10.1128/aem.71.6.3112-3118.2005. PubMed PMID: 15933009;  
748 PubMed Central PMCID: PMCPMC1151871.
- 749 49. Panaccione DG, Arnold SL. Ergot alkaloids contribute to virulence in an insect  
750 model of invasive aspergillosis. *Sci Rep.* 2017;7(1):8930. Epub 2017/08/23. doi:  
751 10.1038/s41598-017-09107-2. PubMed PMID: 28827626; PubMed Central PMCID:  
752 PMCPMC5567044.
- 753 50. Fallon JP, Reeves EP, Kavanagh K. Inhibition of neutrophil function following  
754 exposure to the *Aspergillus fumigatus* toxin fumagillin. *J Med Microbiol.* 2010;59(Pt  
755 6):625-33. Epub 2010/03/06. doi: 10.1099/jmm.0.018192-0. PubMed PMID: 20203215.
- 756 51. Guruceaga X, Ezpeleta G, Mayayo E, Sueiro-Olivares M, Abad-Diaz-De-Cerio A,  
757 Aguirre Urizar JM, et al. A possible role for fumagillin in cellular damage during host  
758 infection by *Aspergillus fumigatus*. *Virulence.* 2018;9(1):1548-61. Epub 2018/09/27. doi:  
759 10.1080/21505594.2018.1526528. PubMed PMID: 30251593; PubMed Central PMCID:  
760 PMCPMC6177242.
- 761 52. Catlett NL, Lee B-N, Yoder OC, Turgeon BG. Split-marker recombination for  
762 efficient targeted deletion of fungal genes. *Fungal Genet News.* 2002;50:9-11.
- 763 53. Punt PJ, Oliver RP, Dingemans MA, Pouwels PH, van den Hondel CA.  
764 Transformation of *Aspergillus* based on the hygromycin B resistance marker from  
765 *Escherichia coli*. *Gene.* 1987;56(1):117-24. PubMed PMID: 2824287.
- 766 54. Richie DL, Miley MD, Bhabhra R, Robson GD, Rhodes JC, Askew DS. The  
767 *Aspergillus fumigatus* metacaspases CasA and CasB facilitate growth under conditions  
768 of endoplasmic reticulum stress. *Mol Microbiol.* 2007;63(2):591-604. PubMed PMID:  
769 17176258.
- 770 55. Liu H, Lee MJ, Solis NV, Phan QT, Swidergall M, Ralph B, et al. *Aspergillus*  
771 *fumigatus* CalA binds to integrin  $\alpha 5 \beta 1$  and mediates host cell invasion. *Nat Microbiol.*  
772 2016;2:16211.
- 773 56. Min K, Ichikawa Y, Woolford CA, Mitchell AP. *Candida albicans* gene deletion  
774 with a transient CRISPR-Cas9 system. *mSphere.* 2016;1(3). Epub 2016/06/25. doi:  
775 10.1128/mSphere.00130-16. PubMed PMID: 27340698; PubMed Central PMCID:  
776 PMCPMC4911798.
- 777 57. Nødvig CS, Nielsen JB, Kogle ME, Mortensen UH. A CRISPR-Cas9 system for  
778 genetic engineering of filamentous fungi. *PLoS One.* 2015;10(7):e0133085. Epub  
779 2015/07/16. doi: 10.1371/journal.pone.0133085. PubMed PMID: 26177455; PubMed  
780 Central PMCID: PMCPMC4503723.
- 781 58. Macheleidt J, Scherlach K, Neuwirth T, Schmidt-Heck W, Straßburger M,  
782 Spraker J, et al. Transcriptome analysis of cyclic AMP-dependent protein kinase A-  
783 regulated genes reveals the production of the novel natural compound fumipyrrole by  
784 *Aspergillus fumigatus*. *Mol Microbiol.* 2015;96(1):148-62. Epub 2015/01/15. doi:  
785 10.1111/mmi.12926. PubMed PMID: 25582336; PubMed Central PMCID:  
786 PMCPMC4425693.
- 787 59. Pham T, Xie X, Lin X. An intergenic "safe haven" region in *Aspergillus fumigatus*.  
788 *Med Mycol.* 2020. Epub 2020/03/15. doi: 10.1093/mmy/myaa009. PubMed PMID:  
789 32171003.

- 790 60. Kim D, Paggi JM, Park C, Bennett C, Salzberg SL. Graph-based genome  
791 alignment and genotyping with HISAT2 and HISAT-genotype. *Nat Biotechnol.*  
792 2019;37(8):907-15. Epub 2019/08/04. doi: 10.1038/s41587-019-0201-4. PubMed PMID:  
793 31375807; PubMed Central PMCID: PMC7605509.
- 794 61. Anders S, Pyl PT, Huber W. HTSeq--a Python framework to work with high-  
795 throughput sequencing data. *Bioinformatics.* 2015;31(2):166-9. Epub 2014/09/28. doi:  
796 10.1093/bioinformatics/btu638. PubMed PMID: 25260700; PubMed Central PMCID:  
797 PMC4287950.
- 798 62. Anders S, Huber W. Differential expression analysis for sequence count data.  
799 *Genome Biol.* 2010;11(10):R106. Epub 2010/10/29. doi: 10.1186/gb-2010-11-10-r106.  
800 PubMed PMID: 20979621; PubMed Central PMCID: PMC3218662.
- 801 63. Liu H, Gravelat FN, Chiang LY, Chen D, Vanier G, Ejzykowicz DE, et al.  
802 *Aspergillus fumigatus* AcuM regulates both iron acquisition and gluconeogenesis. *Mol*  
803 *Microbiol.* 2010;78(4):1038-54. Epub 2010/11/11. doi: 10.1111/j.1365-  
804 2958.2010.07389.x. PubMed PMID: 21062375; PubMed Central PMCID: PMC3051834.
- 805 64. Ejzykowicz DE, Cunha MM, Rozental S, Solis NV, Gravelat FN, Sheppard DC, et  
806 al. The *Aspergillus fumigatus* transcription factor Ace2 governs pigment production,  
807 conidiation and virulence. *Mol Microbiol.* 2009;72(1):155-69. PubMed PMID: 19220748.
- 808 65. Ejzykowicz DE, Solis NV, Gravelat FN, Chabot J, Li X, Sheppard DC, et al. Role  
809 of *Aspergillus fumigatus* DvrA in host cell interactions and virulence. *Eukaryot Cell.*  
810 2010;9(10):1432-40. Epub 2010/08/03. doi: EC.00055-10 [pii]  
811 10.1128/EC.00055-10. PubMed PMID: 20675576; PubMed Central PMCID:  
812 PMC2950423.
- 813 66. Zhang X, Goncalves R, Mosser DM. The isolation and characterization of murine  
814 macrophages. *Curr Protoc Immunol.* 2008;Chapter 14:Unit 14 1. Epub 2008/11/20. doi:  
815 10.1002/0471142735.im1401s83. PubMed PMID: 19016445; PubMed Central PMCID:  
816 PMC2834554.
- 817 67. Nierman WC, Pain A, Anderson MJ, Wortman JR, Kim HS, Arroyo J, et al.  
818 Genomic sequence of the pathogenic and allergenic filamentous fungus *Aspergillus*  
819 *fumigatus*. *Nature.* 2005;438(7071):1151-6. PubMed PMID: 16372009.
- 820
- 821

822 Table 1. Fold-change and probe counts for selected *A. fumigatus* genes during growth in *Aspergillus* minimal medium (AMM) and during invasive  
823 growth in the mouse lung on days 2, 4, and 5.

| Process          | Gene ID    | Gene Name | Function                                                                                                                                       | Fold-change relative to growth in AMM |        |        | Normalized Probe Counts |       |        |       |
|------------------|------------|-----------|------------------------------------------------------------------------------------------------------------------------------------------------|---------------------------------------|--------|--------|-------------------------|-------|--------|-------|
|                  |            |           |                                                                                                                                                | Day 2                                 | Day 4  | Day 5  | AMM                     | Day 2 | Day 4  | Day 5 |
| Iron homeostasis | Afu1g17270 | fre2      | Metalloreductase involved in response to iron starvation                                                                                       | 1.09                                  | 23.14  | 21.64  | 232                     | 253   | 5369   | 5019  |
|                  | Afu5g03920 | hapX      | bZIP transcription factor required for adaption to both iron depletion and excess and for transcriptional activation of the siderophore system | 1.18                                  | 4.19   | 3.51   | 948                     | 1123  | 3974   | 3326  |
|                  | Afu2g07680 | sidA      | L-ornithine N5-oxygenase; first committed step in siderophore biosynthesis                                                                     | 3.06                                  | 10.93  | 9.07   | 9646                    | 29495 | 105444 | 87529 |
|                  | Afu3g03420 | sidD      | Nonribosomal peptide synthetase 4; involved in extracellular siderophore biosynthesis                                                          | 4.98                                  | 15.17  | 17.36  | 1000                    | 4981  | 15166  | 17351 |
|                  | Afu3g03640 | mirB      | Putative siderophore iron transporter                                                                                                          | 5.27                                  | 31.94  | 22.07  | 1231                    | 6480  | 39307  | 27157 |
|                  | Afu7g06060 | sit1      | Putative siderophore transporter                                                                                                               | 0.44                                  | 10.50  | 6.88   | 1126                    | 498   | 11822  | 7751  |
|                  | Afu5g11260 | sreA      | GATA transcription factor that regulates iron uptake                                                                                           | 0.00                                  | 0.14   | 0.08   | 2310                    | 0     | 316    | 177   |
| Zinc homeostasis | Afu4g09560 | zrfC      | Zinc transporter that functions in neutral or alkaline environments                                                                            | 58.86                                 | 158.24 | 143.41 | 248                     | 14598 | 39244  | 35566 |
|                  | Afu1g01550 | zrfA      | Putative plasma membrane zinc transporter                                                                                                      | 18.82                                 | 10.41  | 8.15   | 19                      | 354   | 196    | 153   |
|                  | Afu4g09580 | aspf2     | Allergen Asp f 2; expressed in alkaline zinc-limiting conditions                                                                               | 47.91                                 | 218.08 | 136.52 | 170                     | 8141  | 37057  | 23198 |
|                  | Afu1g10080 | zafA      | Putative C2H2 zinc-responsive transcriptional activator                                                                                        | 3.99                                  | 2.06   | 2.40   | 1010                    | 4034  | 2084   | 2429  |



|                                 |            |       |                                                                                                             |         |         |         |       |      |       |       |
|---------------------------------|------------|-------|-------------------------------------------------------------------------------------------------------------|---------|---------|---------|-------|------|-------|-------|
| Nitrogen uptake                 | Afu1g17470 | nrtB  | Putative high-affinity nitrate transporter                                                                  | 461.99  | 16.95   | 32.20   | 13    | 6162 | 226   | 429   |
|                                 | Afu6g01970 | areA  | Putative GATA-like transcription factor; required for growth on numerous nitrogen sources                   | 0.00    | 1.71    | 2.08    | 1891  | 0    | 3234  | 3934  |
|                                 | Afu5g00710 |       | GABA permease                                                                                               | 9.63    | 45.45   | 39.14   | 168   | 1616 | 7633  | 6572  |
| Stress response                 | Afu2g01260 | srbA  | Sterol regulatory element binding protein (SREBP); basic helix-loop-helix leucine zipper DNA binding domain | 0.85    | 1.81    | 1.73    | 9403  | 7991 | 16995 | 16299 |
|                                 | Afu3g04070 | hacA  | bZIP transcription factor, major regulator of the unfolded protein response                                 | 0.54    | 0.46    | 0.46    | 12752 | 6930 | 5895  | 5926  |
|                                 | Afu3g11970 | pacC  | C2H2 finger domain transcription factor; required for response to alkaline pH                               | 0.59    | 1.73    | 1.72    | 1864  | 1100 | 3230  | 3202  |
|                                 | Afu4g09080 | sebA  | Putative transcription factor; localizes to the nucleus in response to oxidative stress and heat shock      | 4.56    | 6.42    | 5.33    | 868   | 3959 | 5571  | 4623  |
|                                 | Afu1g05800 | mkk2  | Putative mitogen-activated protein kinase kinase; essential for cell wall integrity signaling               | 0.11    | 2.91    | 2.62    | 1600  | 175  | 4662  | 4193  |
|                                 | Afu5g08420 | sho1  | Putative transmembrane osmosensor                                                                           | 0.44    | 2.30    | 2.42    | 2990  | 1309 | 6864  | 7233  |
|                                 | Afu5g04170 | hsp90 | Heat shock protein; allergen Asp f 12;                                                                      | 0.01    | 0.18    | 0.19    | 7795  | 90   | 1406  | 1518  |
|                                 | Afu8g01670 | cat2  | Putative bifunctional catalase-peroxidase                                                                   | 0.22    | 0.45    | 0.22    | 1450  | 319  | 655   | 312   |
|                                 | Afu4g11580 | sod2  | Putative manganese-superoxide dismutase                                                                     | 0.10    | 0.20    | 0.23    | 932   | 90   | 185   | 211   |
|                                 | Afu4g00860 | dprA  | Dehydrin-like protein; plays a role in oxidative, osmotic and pH stress responses                           | 0.43    | 0.50    | 0.44    | 210   | 90   | 105   | 92    |
| Secondary metabolite production | Afu6g09690 | gliG  | Glutathione S-transferase encoded in the gliotoxin biosynthetic gene cluster                                | 5469.48 | 6614.27 | 9370.72 | 0     | 882  | 1066  | 1510  |

|            |       |                                                                                                           |        |        |        |       |       |       |       |
|------------|-------|-----------------------------------------------------------------------------------------------------------|--------|--------|--------|-------|-------|-------|-------|
| Afu6g09660 | gliP  | Non-ribosomal peptide synthetase encoded in the gliotoxin biosynthetic gene cluster                       | 805.63 | 649.15 | 657.75 | 47    | 38108 | 30706 | 31113 |
| Afu6g09630 | gliZ  | Zn2Cys6 binuclear transcription factor, regulates genes required for gliotoxin biosynthesis               | 31.18  | 50.79  | 39.87  | 114   | 3552  | 5786  | 4542  |
| Afu6g02690 | mtfA  | Transcription factor involved in regulation of morphogenesis, gliotoxin production and virulence          | 2.47   | 8.05   | 9.08   | 351   | 867   | 2822  | 3184  |
| Afu7g00130 | nscR  | Pathway-specific Zn(II)2Cys6 transcriptional factor; role in neosartoricin and fumicycline A biosynthesis | 21.31  | 209.35 | 308.36 | 12    | 263   | 2582  | 3803  |
| Afu3g00590 | aspHS | Asp-hemolysin; hemolytic toxin                                                                            | 26.33  | 0.15   | 4.07   | 103   | 2707  | 15    | 419   |
| Afu5g02330 | aspf1 | Allergen Asp f 1; ribonuclease mitogillin family of cytotoxins                                            | 0.00   | 0.01   | 0.00   | 99853 | 468   | 951   | 320   |
| Afu8g00420 | fumR  | C6 zinc finger domain protein required for expression of fumagillin and pseurotin gene clusters           | 0.10   | 0.15   | 0.12   | 2416  | 237   | 365   | 290   |
| Afu3g12890 | hasA  | C6 transcription factor; hexadehydroastechrome biosynthesis                                               | 0.00   | 0.21   | 0.15   | 8234  | 0     | 1712  | 1231  |
| Afu4g14540 | tpcE  | Putative Zn2Cys6 transcription factor involved in trypacidin biosynthesis                                 | 0.00   | 0.23   | 0.16   | 172   | 0     | 40    | 27    |

824  
825  
826

827

| Table 2. Comparisons among datasets of differentially expressed genes                                                                                                                                                                                                                                                                                                         |                                           |
|-------------------------------------------------------------------------------------------------------------------------------------------------------------------------------------------------------------------------------------------------------------------------------------------------------------------------------------------------------------------------------|-------------------------------------------|
| Dataset                                                                                                                                                                                                                                                                                                                                                                       | Similarity to lung day 5 vs AMM (P-value) |
| lung day 2 vs AMM                                                                                                                                                                                                                                                                                                                                                             | <1.00E-10                                 |
| lung day 4 vs AMM                                                                                                                                                                                                                                                                                                                                                             | <1.00E-10                                 |
| AMM low N Fe vs AMM                                                                                                                                                                                                                                                                                                                                                           | <1.00E-10                                 |
| AMM low N Fe Zn vs AMM                                                                                                                                                                                                                                                                                                                                                        | <1.00E-10                                 |
| AMM low Zn vs AMM                                                                                                                                                                                                                                                                                                                                                             | <1.00E-10                                 |
| AMM low Fe Zn vs AMM                                                                                                                                                                                                                                                                                                                                                          | <1.00E-10                                 |
| AMM low N Zn vs AMM                                                                                                                                                                                                                                                                                                                                                           | <1.00E-10                                 |
| AMM low Fe vs AMM                                                                                                                                                                                                                                                                                                                                                             | 2.38E-10                                  |
| AMM low N vs AMM                                                                                                                                                                                                                                                                                                                                                              | 6.20E-08                                  |
| lung germling 12-14 hr vs YPD 37° [8]                                                                                                                                                                                                                                                                                                                                         | 4.57E-07                                  |
| lung germling 12 hr vs spores [7]                                                                                                                                                                                                                                                                                                                                             | 7.30E-07                                  |
| lung germling 16 hr vs spores [7]                                                                                                                                                                                                                                                                                                                                             | 9.00E-07                                  |
| AMM+serum vs AMM                                                                                                                                                                                                                                                                                                                                                              | 1.35E-06                                  |
| <p>Description: Genes up-regulated <math>\geq 2</math> fold in our lung day 5 vs AMM dataset were compared to genes up-regulated <math>\geq 2</math> fold in each comparison dataset listed above. The probability that a correlation was due to chance alone was calculated using Fisher's Exact Test. The calculated threshold of significance is a P-value of 0.00017.</p> |                                           |

828

829

830 Table 3. Genes encoding potential transcription factors that were selected for  
831 construction of deletion mutants.

| Gene ID    | Gene Name | Fold-change<br>(relative to growth in AMM) |                 |                 |                 | Mean lung<br>probe<br>counts<br>(day 5) |
|------------|-----------|--------------------------------------------|-----------------|-----------------|-----------------|-----------------------------------------|
|            |           | AMM<br>24 h                                | Lung<br>(day 2) | Lung<br>(day 4) | Lung<br>(day 5) |                                         |
| Afu1g15910 |           | 1                                          | 26.4            | 35.1            | 43.1            | 445                                     |
| Afu3g08010 | Ace1      | 1                                          | 0.8             | 1.0             | 0.9             | 378                                     |
| Afu3g08050 |           | 1                                          | 0.4             | 3.9             | 6.2             | 152                                     |
| Afu3g08520 | RImA      | 1                                          | 2.2             | 2.1             | 2.1             | 163                                     |
| Afu4g10220 |           | 1                                          | 0.9             | 2.0             | 1.8             | 824                                     |
| Afu5g01650 |           | 1                                          | 1.6             | 2.5             | 2.3             | 1121                                    |
| Afu5g13790 |           | 1                                          | 29.2            | 1.9             | 2.6             | 33                                      |
| Afu7g00130 | NscR      | 1                                          | 21.3            | 209.4           | 308.4           | 147                                     |
| Afu8g05270 |           | 1                                          | 0.5             | 2.2             | 2.0             | 164                                     |

832

833

834 Table 4. *A. fumigatus* strains used in the current study.

835

| <b>Strain</b>               | <b>Genotype</b>                                    | <b>Reference</b> |
|-----------------------------|----------------------------------------------------|------------------|
| Af293                       | Wild-type                                          | [67]             |
| $\Delta rlmA$               | Af293; <i>rlmA::hph</i>                            | Present study    |
| $\Delta ace1$               | Af293; <i>ace1::hph</i>                            | Present study    |
| $\Delta afu1g15910$         | Af293; <i>Afu1g15910::hph</i>                      | Present study    |
| $\Delta afu3g08050$         | Af293; <i>Afu3g08050::hph</i>                      | Present study    |
| $\Delta afu4g10220$         | Af293; <i>Afu4g10220::hph</i>                      | Present study    |
| $\Delta afu5g01650$         | Af293; <i>Afu5g01650::hph</i>                      | Present study    |
| $\Delta afu5g13790$         | Af293; <i>Afu5g13790::hph</i>                      | Present study    |
| $\Delta afu7g00130$         | Af293; <i>Afu7g00130::hph</i>                      | Present study    |
| $\Delta afu8g05270$         | Af293; <i>Afu8g05270::hph</i>                      | Present study    |
| $\Delta rlmA+rlmA$          | $\Delta rlmA$ ; <i>rlmA</i> ; <i>ble</i>           | Present study    |
| $\Delta ace1+ace1$          | $\Delta ace1$ ; <i>ace1</i> ; <i>ble</i>           | Present study    |
| $\Delta laeA$               | Af293.1; <i>laeA::pyrG1</i>                        | [46]             |
| $\Delta dmaW$               | Af293; <i>dmaW::hph</i>                            | Present study    |
| $\Delta fumR$               | Af293; <i>fumR::hph</i>                            | Present study    |
| $\Delta fumR\Delta dmaW$    | $\Delta dmaW$ ; <i>fumR::ble</i>                   | Present study    |
| $\Delta ace1+gpdA-aspf1$    | $\Delta ace1$ ; <i>gpdA-aspf1</i> ; <i>ble</i>     | Present study    |
| Af293+ <i>gpdA-GFP</i>      | Af293; <i>gpdA-GFP</i> ; <i>ble</i>                | [55]             |
| $\Delta ace1+gpdA-GFP$      | $\Delta ace1$ ; <i>gpdA-GFP</i> ; <i>ble</i>       | Present study    |
| $\Delta ace1+ace1+gpdA-GFP$ | $\Delta ace1+ace1$ ; <i>gpdA-GFP</i> ; <i>ptrA</i> | Present study    |

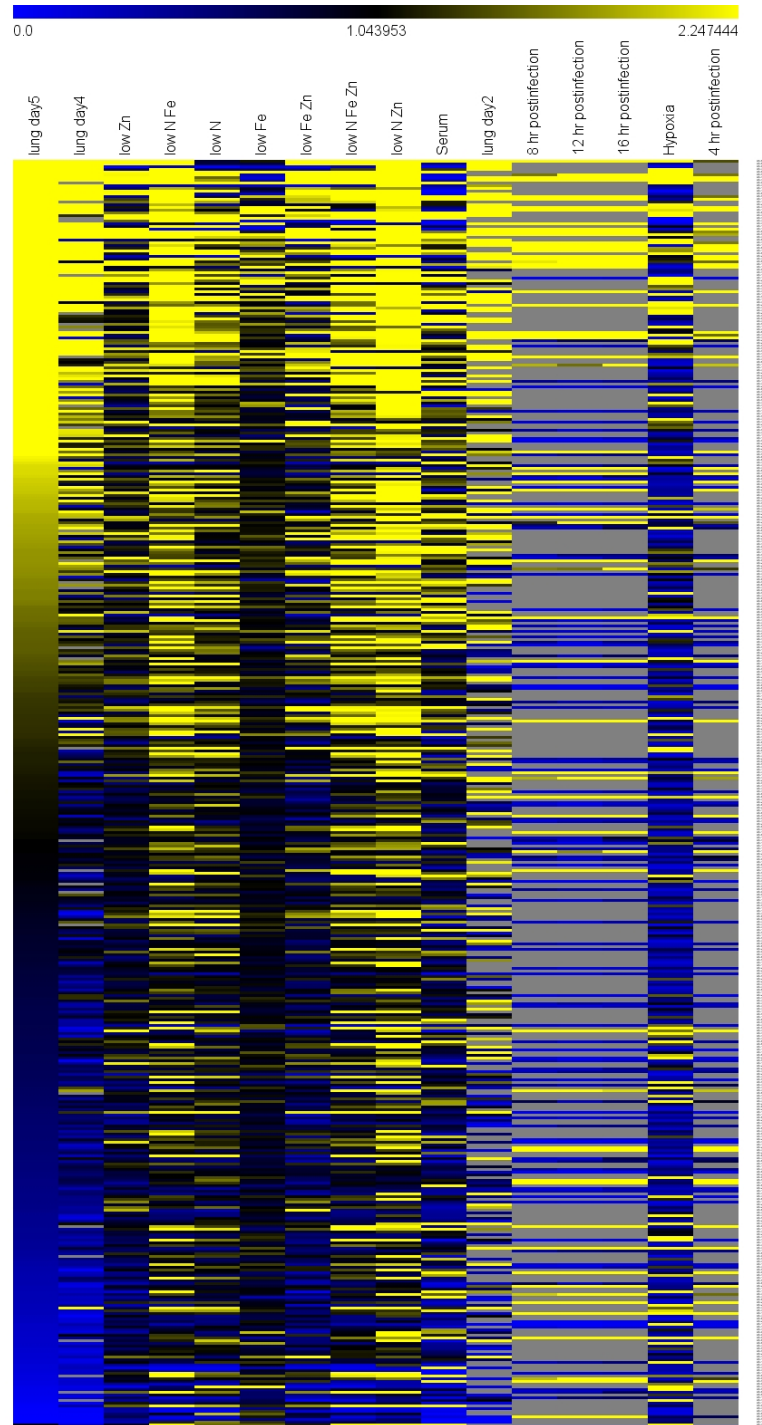

836  
837  
838  
839  
840  
841  
842  
843  
844

**Fig 1. Hierarchical clustering of gene expression datasets.** The Nanostring datasets and published datasets were compared by hierarchical clustering based on the 467 genes in the Nanostring datasets. Select dataset are indicated, including lung germlings [7, 8], invasive infection (current data), growth in low zinc or low nitrogen (current *in vitro* data for *Aspergillus* minimal medium (AMM) lacking zinc or nitrate alone, or in combination with each other and with limiting iron), and low iron alone [21]. Grey areas indicated genes with undetectable expression.

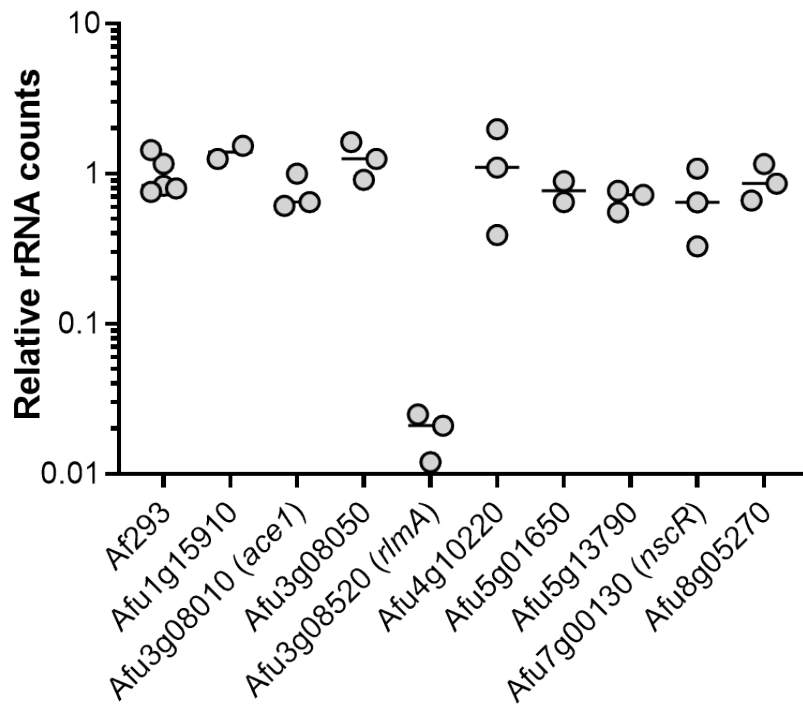

845

846

**Fig 2. RlmA is required for growth in the lungs during invasive aspergillosis.**

847

Pulmonary fungal burden of mice after 5 days of infection with either *A. fumigatus* strain Af293 or mutants deleted for the indicated genes. Lung fungal burden was determined by Nanostring measurement *A. fumigatus* rRNA levels relative to mouse *ACTB*, *GAPDH*, and *PPIA* levels. Results are from 2-3 mice per strain and are normalized data from mice infected with strain Af293.

849

850

851

852

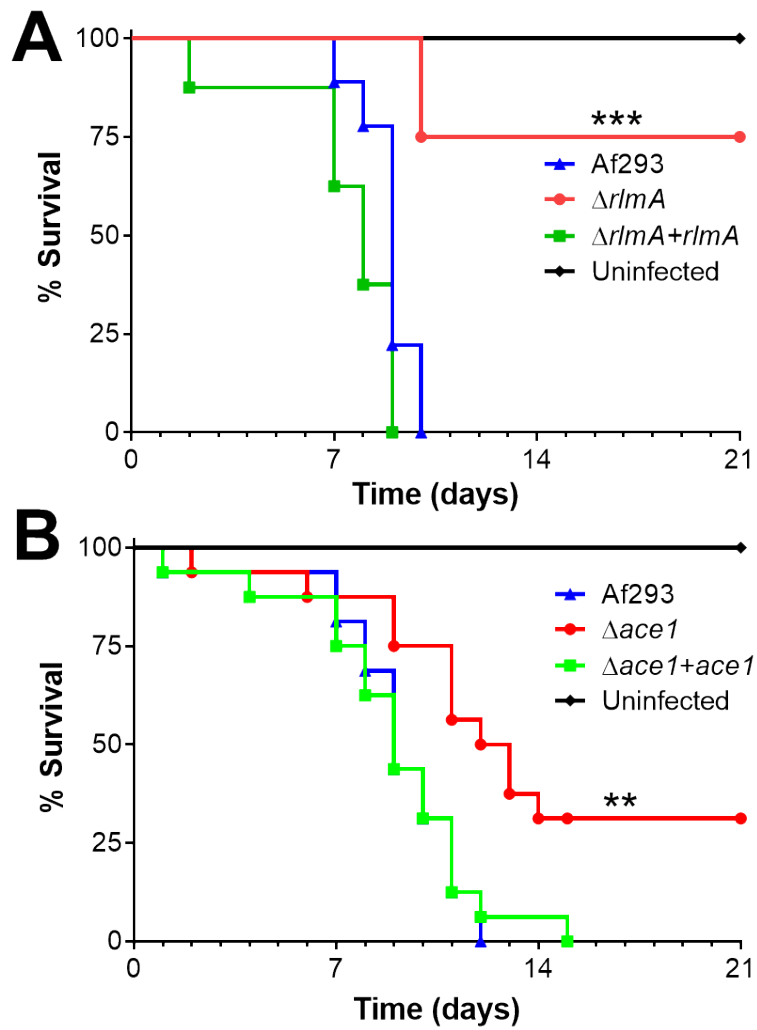

853

854 **Fig 3.  $\Delta rlmA$  and  $\Delta ace1$  mutants have attenuated virulence.** Survival of  
855 corticosteroid-immunosuppressed mice infected with the indicated strains. Results are  
856 the combined data from two independent experiments, each using 8 mice per strain. \*\*,  
857  $p < 0.01$ ; \*\*\*,  $p < 0.001$ .

858



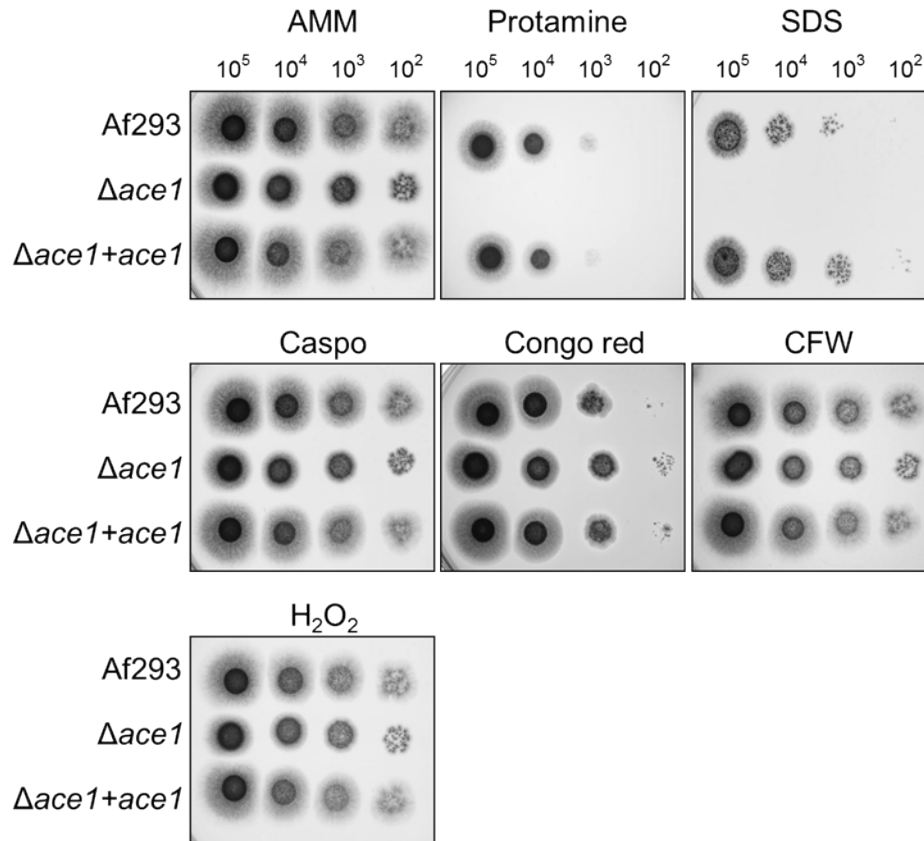

859

860

861 **Fig 4. Increased susceptibility of the  $\Delta ace1$  mutant to protamine and SDS.** Serial  
862 10-fold dilutions of the indicated strains of *A. fumigatus* were spotted onto *Aspergillus*

863 minimal medium (AMM) containing the indicated stressors. The plates were imaged after  
864 incubation at 37°C for 2 d. Caspo, caspofungin; CFW, calcofluor white.

864

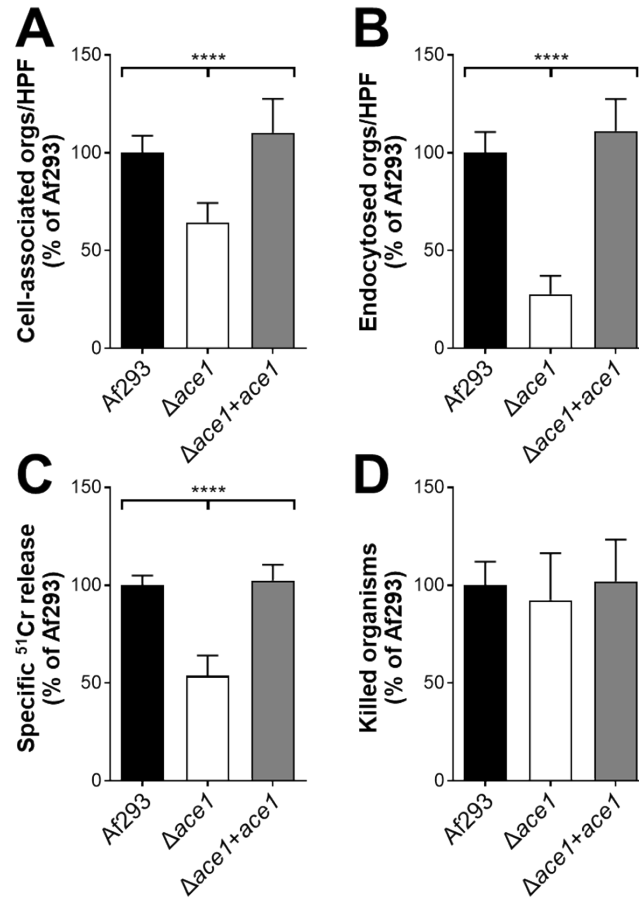

865 **Fig 5. The  $\Delta ace1$  mutant is defective in pulmonary epithelial cell adherence,**  
866 **invasion, and damage.** (A-B) The indicated strains of *A. fumigatus* were incubated with  
867 the A549 pulmonary epithelial cell line for 2.5 h, after which the number of cell-  
868 associated (A; a measure of adherence) and endocytosed (B) organisms was  
869 determined by a differential fluorescence assay. (C) The extent of epithelial cell damage  
870 induced by the indicated strains after 16 h of infection. (D) The percentage of cells of  
871 the indicated *A. fumigatus* strains that were killed by mouse bone marrow-derived  
872 macrophages after 8 h of infection. Results are mean  $\pm$  SD of 3 experiments, each  
873 performed in triplicate. Orgs/HPF, organisms per high-powered field; \*\*\*\*,  $p < 0.0001$ .  
874

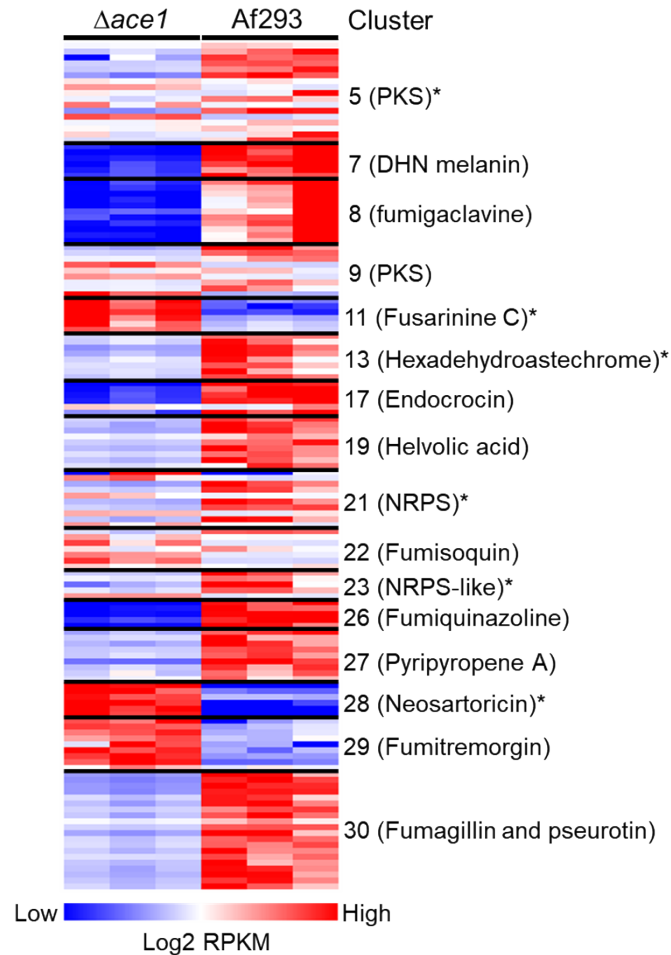

875

876

877

878

879

880

881

882

883

884

**Fig 6. Ace1 governs the expression of secondary metabolite gene clusters.** Heat map showing secondary metabolite gene clusters in which the expression of at least 50% of genes were altered in the  $\Delta ace1$  mutant relative to strain Af293. The transcript levels were assessed by RNA-seq analysis of organisms that were grown in liquid AMM with low nitrogen and low zinc in biological triplicate. Secondary metabolite cluster numbers are from [45]. \*, gene clusters that were not found to be regulated by LaeA by microarray analysis [46]; NRPS, non-ribosomal peptide synthase; PKS, polyketide synthase.

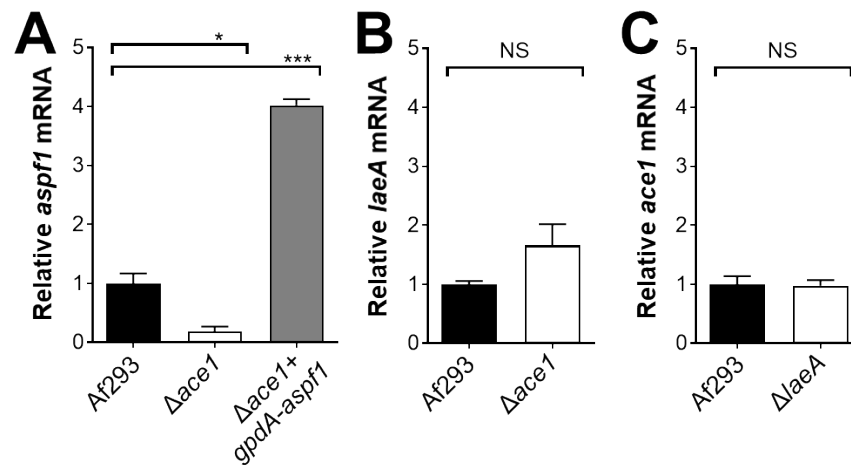

885

886 **Fig 7. qPCR verification of transcriptional profiling results.** Real-time PCR analysis  
887 of the relative transcript levels of *aspf1* (A), *laeA* (B), and *ace1* (C) in the indicates  
888 strains. The organisms were grown in AMM with low nitrogen and low zinc. Results are  
889 the mean  $\pm$  SD of 3 biological replicates. \*,  $P < 0.05$ ; \*\*\*,  $P < 0.001$ ; NS, not significant.

890

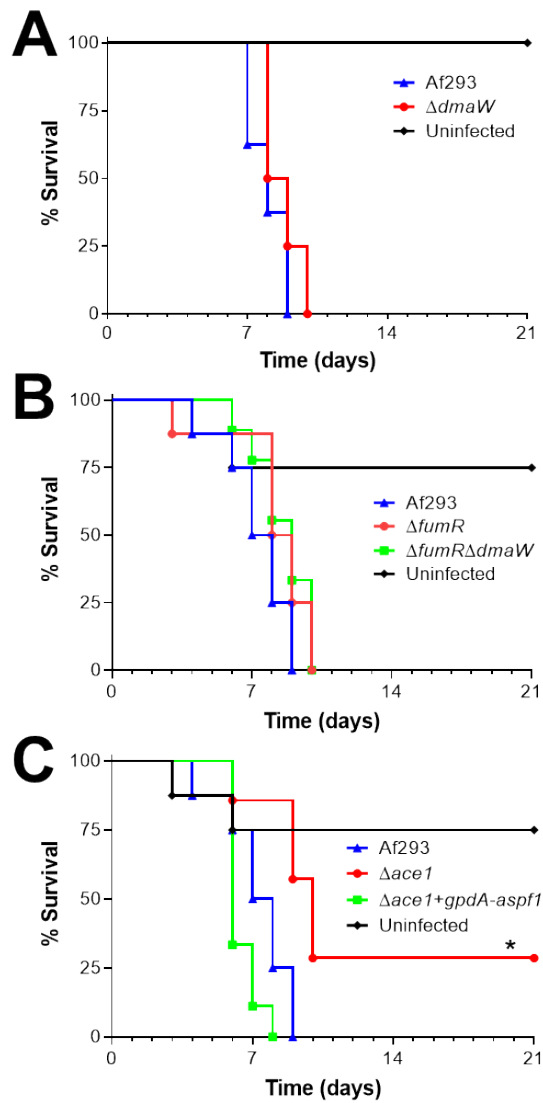

891

892

893

894

**Fig 8. Forced expression of *aspf1* rescues the virulence defect of the  $\Delta ace1$  mutant.** Survival of mice infected with the indicated strains of *A. fumigatus*. Results are from 8 mice per strain. \*,  $p < 0$ .
